# Supplementary material for: Proteomics of Vespa velutina nigrithorax Venom Sac Queens and Workers: A Quantitative SWATH-MS Analysis
Source: Toxins (Basel). 2023 Apr 3;15(4):266. doi: 10.3390/toxins15040266 (PMC10144020; doi:10.3390/toxins15040266)
Supplement: Supplementary file 1 [file toxins-15-00266-s001.zip › Supplementary File S1.xlsx]

## Sheet: SQ_SW_normalized areas_MLR
Uniprot code	Group	Protein names	Organism	SQ1	SQ2	SQ3	SQ4	SW1	SW2	SW3	SW4
A0A0L0AMD2	9ENTR	Porin	Klebsiella sp. RIT-PI-d	2391.9	0	0	1813.7	733.04	0	432.41	390.45
A0A0L0AQN9	9ENTR	Major outer membrane lipoprotein Lpp	Klebsiella sp. RIT-PI-d	10720	3320.7	10691	13649	4340.4	9717.1	4998	5877.2
A0A0L0AW36	9ENTR	Enolase (EC 4.2.1.11) (2-phospho-D-glycerate hydro-lyase) (2-phosphoglycerate dehydratase)	Klebsiella sp. RIT-PI-d	5200.8	3272	5836.1	3602.1	1475.7	4295.3	2279.9	1490.3
A0A0L0BDD6	9PSED	Lipoprotein	Pseudomonas sp. RIT-PI-a	5552.2	4793.9	3361.5	1009.8	2245.6	2864.5	4015.5	1990.5
A0A154NWX1	DUFNO	Laminin subunit beta-1	Dufourea novaeangliae (Sweat bee)	2135.8	6408	7431.7	3305	411.38	368.73	1721.7	486.66
A0A154NXS4	DUFNO	Troponin I	Dufourea novaeangliae (Sweat bee)	15345	22746	84635	33357	8042.2	58247	9010.1	5044.8
A0A154NYM3	DUFNO	Transgelin	Dufourea novaeangliae (Sweat bee)	76107	98982	150640	114260	1873.3	8998.9	11896	3836.5
A0A154P037	DUFNO	Lambda-crystallin like protein	Dufourea novaeangliae (Sweat bee)	36791	46254	29348	39858	40634	26835	66191	20433
A0A154P1L6	DUFNO	ATP synthase subunit beta (EC 7.1.2.2)	Dufourea novaeangliae (Sweat bee)	112980	108000	147920	94355	21547	100290	39603	32450
A0A154P1Q6	DUFNO	Elongation factor 1-alpha	Dufourea novaeangliae (Sweat bee)	4968.3	40935	126190	30230	3249.5	7345.5	6987.2	0
A0A154P289	DUFNO	Vacuolar proton pump subunit B (V-ATPase subunit B) (Vacuolar proton pump subunit B)	Dufourea novaeangliae (Sweat bee)	42074	36656	35246	39026	14250	29704	26710	6081.5
A0A154P296	DUFNO	Acetyl-CoA hydrolase (EC 3.1.2.1) (Acetyl-CoA deacylase)	Dufourea novaeangliae (Sweat bee)	95901	131210	187250	80744	45250	77736	45618	18660
A0A154P3I0	DUFNO	Proteasome subunit alpha type	Dufourea novaeangliae (Sweat bee)	38283	35919	35578	16882	19267	13289	26650	6335.9
A0A154P3Q8	DUFNO	Elongation factor 2	Dufourea novaeangliae (Sweat bee)	19406	18344	19873	25855	4954.8	18143	13202	5375.7
A0A154P3S2	DUFNO	Muscle M-line assembly protein unc-89	Dufourea novaeangliae (Sweat bee)	86772	69434	100280	92843	36888	43060	53467	16179
A0A154P4T7	DUFNO	Four and a half LIM domains protein 2	Dufourea novaeangliae (Sweat bee)	17212	4561	24173	18064	1514.1	0	278.33	447.86
A0A154P559	DUFNO	Glucose dehydrogenase [acceptor]	Dufourea novaeangliae (Sweat bee)	6204.9	1927.9	5458.7	7307.7	4495.3	3579.5	3840.9	595.97
A0A154P796	DUFNO	Spectrin alpha chain	Dufourea novaeangliae (Sweat bee)	31162	23389	21430	32214	18011	7298.9	12135	3974.2
A0A154PA13	DUFNO	Chitinase-like protein Idgf4	Dufourea novaeangliae (Sweat bee)	66942	40616	27413	51289	11982	35292	70039	31258
A0A154PAT6	DUFNO	Malate dehydrogenase (EC 1.1.1.37)	Dufourea novaeangliae (Sweat bee)	13299	37702	35715	45452	21971	4509.8	15857	9458.1
A0A154PBQ9	DUFNO	Putative enoyl-CoA hydratase, mitochondrial	Dufourea novaeangliae (Sweat bee)	33724	20130	38999	19401	12772	16864	61439	22179
A0A154PD98	DUFNO	Nidogen-1	Dufourea novaeangliae (Sweat bee)	43921	49667	34436	31222	8322.3	0	21225	6079.1
A0A154PEK6	DUFNO	Citrate synthase	Dufourea novaeangliae (Sweat bee)	82301	117450	88654	142690	54057	58523	111390	41652
A0A154PFC9	DUFNO	Ornithine aminotransferase (EC 2.6.1.13)	Dufourea novaeangliae (Sweat bee)	0	12429	6197.1	2917.5	35639	10611	12534	8295.9
A0A154PH15	DUFNO	Vinculin	Dufourea novaeangliae (Sweat bee)	1396.6	0	635.76	1422	401.19	1879.3	487.81	154.1
A0A154PH44	DUFNO	Glycerol-3-phosphate dehydrogenase [NAD(+)] (EC 1.1.1.8)	Dufourea novaeangliae (Sweat bee)	100220	202430	65616	52815	60841	79219	54738	19191
A0A154PHR8	DUFNO	Coronin	Dufourea novaeangliae (Sweat bee)	7182.1	1795	1720.2	1871	1083.7	0	1148.3	595.38
A0A154PIM3	DUFNO	Twitchin	Dufourea novaeangliae (Sweat bee)	125120	140760	161710	127460	108410	115930	134570	40337
A0A154PJJ4	DUFNO	Annexin	Dufourea novaeangliae (Sweat bee)	48999	60696	85809	60766	16964	22574	25852	5269.5
A0A154PJP5	DUFNO	Titin	Dufourea novaeangliae (Sweat bee)	208760	106120	121720	180780	71419	85773	82950	44391
A0A154PJQ2	DUFNO	alpha-L-fucosidase (EC 3.2.1.51)	Dufourea novaeangliae (Sweat bee)	18036	15877	7227.5	18001	8573.9	22242	13281	4104
A0A154PJR5	DUFNO	Filamin-A	Dufourea novaeangliae (Sweat bee)	31190	35596	48180	32993	33405	30619	36505	6931.6
A0A154PJZ1	DUFNO	Paramyosin, long form	Dufourea novaeangliae (Sweat bee)	456060	346120	422930	465500	63569	534350	159710	61916
A0A154PKM2	DUFNO	Phosphotransferase (EC 2.7.1.-)	Dufourea novaeangliae (Sweat bee)	28263	0	885.87	22859	26598	2697.7	13080	3273.8
A0A154PKU8	DUFNO	Malic enzyme	Dufourea novaeangliae (Sweat bee)	6022	3012.2	7745.9	2298.4	2562.9	2082.3	5163.2	1335.6
A0A154PLJ1	DUFNO	Heat shock 70 kDa protein cognate 5	Dufourea novaeangliae (Sweat bee)	16406	22283	10461	12254	2809.8	1038.9	7321.9	2864.1
A0A154PMG3	DUFNO	Phosphoglycerate mutase (EC 5.4.2.11) (EC 5.4.2.4)	Dufourea novaeangliae (Sweat bee)	0	2174	2213.3	1745.7	1054.4	5261.3	1958	356.14
A0A154PMQ1	DUFNO	Aminopeptidase (EC 3.4.11.-)	Dufourea novaeangliae (Sweat bee)	4061.9	8271.2	0	1042.8	3744.3	5500.5	0	3770.3
A0A154PN63	DUFNO	Malate dehydrogenase (EC 1.1.1.37)	Dufourea novaeangliae (Sweat bee)	95914	143840	97135	53426	75289	91949	158570	46931
A0A154PNQ0	DUFNO	Sortilin-related receptor (Low-density lipoprotein receptor relative with 11 ligand-binding repeats) (Sorting protein-related receptor containing LDLR class A repeats)	Dufourea novaeangliae (Sweat bee)	25443	57411	62951	47493	19222	17421	28243	11354
A0A154PP88	DUFNO	Alpha-1,4 glucan phosphorylase (EC 2.4.1.1)	Dufourea novaeangliae (Sweat bee)	107970	40794	96014	91878	17450	23091	34000	25668
A0A154PPS0	DUFNO	phosphopyruvate hydratase (EC 4.2.1.11) (2-phospho-D-glycerate hydro-lyase)	Dufourea novaeangliae (Sweat bee)	154220	101010	113500	110940	48978	58003	110030	31581
A0A154PQ04	DUFNO	Fructose-bisphosphate aldolase (EC 4.1.2.13)	Dufourea novaeangliae (Sweat bee)	2244.1	8062.8	3872.1	12272	3364.1	1559.6	850.16	1945.3
A0A154PQ65	DUFNO	Multifunctional fusion protein [Includes: L-glutamate gamma-semialdehyde dehydrogenase (EC 1.2.1.88) (L-glutamate gamma-semialdehyde dehydrogenase); Delta-1-pyrroline-5-carboxylate dehydrogenase (P5C dehydrogenase)]	Dufourea novaeangliae (Sweat bee)	21760	31925	32655	18456	21409	8370.6	15771	3015.1
A0A154PQA1	DUFNO	Myofilin	Dufourea novaeangliae (Sweat bee)	23063	27044	101980	50282	5878.5	79922	8732.5	5874.6
A0A154PQH0	DUFNO	Glycogenin-1	Dufourea novaeangliae (Sweat bee)	99232	158370	137920	124570	45351	57041	76953	13763
A0A154PQS0	DUFNO	H(+)-transporting two-sector ATPase (EC 7.1.2.2)	Dufourea novaeangliae (Sweat bee)	26740	23869	32463	13208	7918.1	29578	10616	4836.7
A0A154PS34	DUFNO	PDZ and LIM domain protein Zasp	Dufourea novaeangliae (Sweat bee)	22139	10031	68719	28518	1738.8	1485.6	6914.9	1236.3
A0A154PS68	DUFNO	Dystonin	Dufourea novaeangliae (Sweat bee)	18658	11162	10410	12017	7449	14971	12759	2204.2
A0A154PS72	DUFNO	Profilin	Dufourea novaeangliae (Sweat bee)	3987.2	12046	8379.8	5269.1	656.15	0	1887	671.59
A0A154PSQ8	DUFNO	Myosin heavy chain, muscle	Dufourea novaeangliae (Sweat bee)	1136000	906140	718180	1156400	66432	1983700	380010	106560
A0A1B1JID1	APIME	Superoxide dismutase [Cu-Zn] (EC 1.15.1.1)	Apis mellifera (Honeybee)	2963.3	29629	21924	1173.7	15863	12634	10917	8912.6
A0A1T4LCN6	ENTAG	Glyceraldehyde-3-phosphate dehydrogenase (EC 1.2.1.-)	Enterobacter agglomerans (Erwinia herbicola) (Pantoea agglomerans)	1549.4	1550.3	1400.6	2999.7	2392.8	4781.5	0	1924.6
A0A1V9X4H1	9ACAR	vesicle-fusing ATPase (EC 3.6.4.6)	Tropilaelaps mercedesae	2375.3	1983.7	12020	7428.9	817.2	4845.9	337.65	368.31
A0A1V9XK33	9ACAR	14-3-3 protein zeta-like	Tropilaelaps mercedesae	50745	43442	52035	31801	17022	33159	24854	12490
A0A1V9XK41	9ACAR	Glycerol-3-phosphate dehydrogenase [NAD(+)] (EC 1.1.1.8)	Tropilaelaps mercedesae	98105	168330	207820	96645	39157	43603	137980	36818
A0A1V9XXZ1	9ACAR	Histone H4	Tropilaelaps mercedesae	207420	318410	71153	62670	21995	100160	165390	15541
A0A1V9Y337	9ACAR	Filamin-C-like	Tropilaelaps mercedesae	42063	49330	60924	52264	45779	51754	53475	20343
A0A2A3E214	APICC	alpha-L-fucosidase (EC 3.2.1.51)	Apis cerana cerana (Oriental honeybee)	5172.8	0	9150	5923.3	21527	0	7714.8	411.4
A0A2A3E250	APICC	Antitrypsin	Apis cerana cerana (Oriental honeybee)	715.4	15798	9565.5	1369.6	5640.3	3190.8	4176.4	2978.5
A0A2A3E292	APICC	Glutathione S-transferase	Apis cerana cerana (Oriental honeybee)	182030	310520	231740	179880	149500	122490	231300	132430
A0A2A3E2K9	APICC	1,4-alpha-glucan branching enzyme (EC 2.4.1.18)	Apis cerana cerana (Oriental honeybee)	29987	52211	9886.1	18388	14326	18798	35147	15484
A0A2A3E2U1	APICC	Zinc carboxypeptidase A	Apis cerana cerana (Oriental honeybee)	3013.3	0	3494.8	2798.5	4715.9	1135.8	0	3033
A0A2A3E2W8	APICC	Pyruvate dehydrogenase E1 component subunit alpha (EC 1.2.4.1)	Apis cerana cerana (Oriental honeybee)	9010.1	16698	11493	18204	3972.2	0	9963.5	3196.6
A0A2A3E3Z9	APICC	Triosephosphate isomerase (EC 5.3.1.1)	Apis cerana cerana (Oriental honeybee)	208250	125870	140080	205810	107540	61451	183330	50909
A0A2A3E464	APICC	ATP synthase subunit alpha	Apis cerana cerana (Oriental honeybee)	382270	380760	410410	361420	103860	379970	163520	109410
A0A2A3E509	APICC	Glyceraldehyde-3-phosphate dehydrogenase (EC 1.2.1.12)	Apis cerana cerana (Oriental honeybee)	165160	78372	55262	59564	83377	35797	63325	45314
A0A2A3E5F8	APICC	Transgelin	Apis cerana cerana (Oriental honeybee)	3899.8	4669.5	1014800	41917	3063.6	6554.9	1138.6	1926.4
A0A2A3E5U7	APICC	Talin-2	Apis cerana cerana (Oriental honeybee)	3418.1	5702.8	6847.3	4702.4	1427.7	3277	3211.6	1129.8
A0A2A3E6T3	APICC	Muscle LIM protein Mlp84B	Apis cerana cerana (Oriental honeybee)	4834.4	19740	54934	27490	4382.2	15503	2545.1	1820
A0A2A3E744	APICC	Pyruvate carboxylase (EC 6.4.1.1)	Apis cerana cerana (Oriental honeybee)	5806.9	7079.2	13217	14836	3509.2	4007	9557.4	1581.9
A0A2A3E7B2	APICC	Alpha-1,4 glucan phosphorylase (EC 2.4.1.1)	Apis cerana cerana (Oriental honeybee)	63051	128720	54676	47797	35274	38380	92496	23307
A0A2A3E7C0	APICC	Trehalase (EC 3.2.1.28) (Alpha-trehalose glucohydrolase)	Apis cerana cerana (Oriental honeybee)	0	5859.6	0	3826.2	9152.3	5756.2	3340.5	3716.3
A0A2A3E7D0	APICC	Disorganized muscle protein	Apis cerana cerana (Oriental honeybee)	64185	27925	50339	51494	21777	48099	34804	12180
A0A2A3E811	APICC	Titin	Apis cerana cerana (Oriental honeybee)	15978	8478.2	2970.3	13896	9232	36809	12269	4381.8
A0A2A3E889	APICC	Hexamerin	Apis cerana cerana (Oriental honeybee)	0	0	3286.2	0	1837.6	0	2759.1	1407.9
A0A2A3E8D4	APICC	Myosin heavy chain, muscle	Apis cerana cerana (Oriental honeybee)	175900	189810	109660	175180	10541	316340	48030	7563.9
A0A2A3E8J6	APICC	UTP--glucose-1-phosphate uridylyltransferase (EC 2.7.7.9)	Apis cerana cerana (Oriental honeybee)	24846	15252	9236.6	26387	2986	0	21203	4945.9
A0A2A3E8T5	APICC	Actin	Apis cerana cerana (Oriental honeybee)	1112100	1605100	1290300	1531300	153290	4125000	277610	173960
A0A2A3E9Y7	APICC	glutamine synthetase (EC 6.3.1.2)	Apis cerana cerana (Oriental honeybee)	282.68	587.57	9931.5	3523.3	0	0	1841.9	1269
A0A2A3EA22	APICC	Four and a half LIM domains protein	Apis cerana cerana (Oriental honeybee)	42137	13500	34359	49101	3751.5	6202.5	1744	6281.1
A0A2A3EA59	APICC	alpha-glucosidase (EC 3.2.1.20)	Apis cerana cerana (Oriental honeybee)	141290	106130	33046	76769	499510	132530	193080	69080
A0A2A3EAL0	APICC	Zinc finger protein-like 1 homolog	Apis cerana cerana (Oriental honeybee)	0	1480.9	0	1805.8	4851.5	1742.5	2457.3	2641.9
A0A2A3EBK6	APICC	LIM domain-binding protein	Apis cerana cerana (Oriental honeybee)	26221	9427.2	34810	26788	0	0	1569.1	0
A0A2A3EC59	APICC	Calpain-A	Apis cerana cerana (Oriental honeybee)	48165	47154	63965	40604	14048	16119	12717	10486
A0A2A3ECU3	APICC	Troponin T	Apis cerana cerana (Oriental honeybee)	94186	208940	535230	262400	47459	295270	97450	19757
A0A2A3EDC1	APICC	Tropomyosin-1	Apis cerana cerana (Oriental honeybee)	861990	761940	501670	539210	819930	1020900	670050	226080
A0A2A3EDI2	APICC	Aconitate hydratase, mitochondrial (Aconitase) (EC 4.2.1.3)	Apis cerana cerana (Oriental honeybee)	130140	218050	246000	112580	204050	150970	144190	54223
A0A2A3EDV5	APICC	Ribosomal protein L15	Apis cerana cerana (Oriental honeybee)	12324	20571	2198.5	1902	256.98	2691.8	1692.1	886.96
A0A2A3EF66	APICC	Filamin-B	Apis cerana cerana (Oriental honeybee)	86749	108980	175800	101220	104850	117000	69699	35801
A0A2A3EGD2	APICC	arginine kinase (EC 2.7.3.3)	Apis cerana cerana (Oriental honeybee)	3346500	4242700	6235900	3111300	2695800	1240900	1974800	305540
A0A2A3EH73	APICC	Titin	Apis cerana cerana (Oriental honeybee)	75282	84005	45837	101910	95904	72038	65665	23033
A0A2A3EHE9	APICC	ANK_REP_REGION domain-containing protein	Apis cerana cerana (Oriental honeybee)	0	7288.4	15338	3181.9	0	1548	982.16	962.15
A0A2A3EHJ9	APICC	Tropomyosin	Apis cerana cerana (Oriental honeybee)	751130	819410	480840	616570	438830	532140	683290	203620
A0A2A3EJ73	APICC	Transaldolase (EC 2.2.1.2)	Apis cerana cerana (Oriental honeybee)	43161	58440	56085	50427	80047	35295	83965	102950
A0A2A3EJN3	APICC	Beta-galactosidase (EC 3.2.1.23) (Acid beta-galactosidase)	Apis cerana cerana (Oriental honeybee)	1485.8	0	0	0	13745	35556	50000	23431
A0A2A3EJU2	APICC	Retinal dehydrogenase	Apis cerana cerana (Oriental honeybee)	3582.5	0	3448.8	2747.7	0	4626.9	0	204.96
A0A2A3EKS3	APICC	Fructose-bisphosphate aldolase (EC 4.1.2.13)	Apis cerana cerana (Oriental honeybee)	61748	157060	253140	237020	53205	72635	73927	74710
A0A2A3EL86	APICC	Elongation factor 1-gamma	Apis cerana cerana (Oriental honeybee)	40691	24035	93790	47922	11237	4944.3	11666	7042.3
A0A2A3EL94	APICC	Dihydrolipoyl dehydrogenase (EC 1.8.1.4)	Apis cerana cerana (Oriental honeybee)	17487	11148	16032	3750.7	10956	12470	15285	6239.3
A0A2A3ELF2	APICC	Dihydrolipoyllysine-residue acetyltransferase component of pyruvate dehydrogenase complex	Apis cerana cerana (Oriental honeybee)	1917.5	8809.8	0	2622.2	8440.8	3249	0	5210.3
A0A2A3EMK6	APICC	Alpha-actinin, sarcomeric	Apis cerana cerana (Oriental honeybee)	2137900	2010500	2374600	2458400	974150	945400	1204600	179510
A0A2A3EPL5	APICC	Tubulin beta-4 chain	Apis cerana cerana (Oriental honeybee)	3206.9	574.88	16659	0	422.31	3403.1	1082.9	1895.9
A0A2A3EPX9	APICC	glutamate dehydrogenase [NAD(P)(+)] (EC 1.4.1.3)	Apis cerana cerana (Oriental honeybee)	39481	24278	38518	31894	10758	16376	29501	9060.1
A0A2A3ERL8	APICC	Ubiquitin	Apis cerana cerana (Oriental honeybee)	396960	367820	211320	205580	139360	193450	279250	73994
A0A2A3ESV8	APICC	alpha-glucosidase (EC 3.2.1.20)	Apis cerana cerana (Oriental honeybee)	10951	12036	5856.7	10181	10511	6943.5	7984.2	0
A0A2A3ESZ0	APICC	Apolipophorin	Apis cerana cerana (Oriental honeybee)	3473.3	1908	8578.4	7339.3	1110.2	9701.9	3125.1	2656.3
A0A2V1YN43	ENTAG	Outer membrane protein A (Outer membrane porin A)	Enterobacter agglomerans (Erwinia herbicola) (Pantoea agglomerans)	8805.6	9928.4	16867	6767.6	4345.6	4792.7	7906.7	2795.2
A0A2V4DR27	9GAMM	2,5-diketo-D-gluconic acid reductase	Gilliamella apis	18086	8631.9	22452	15956	5434	23826	7494.9	25740
A0A3M0PGI6	9LACO	Carbamoyl-phosphate synthase large chain (EC 6.3.5.5) (Carbamoyl-phosphate synthetase ammonia chain)	Lactobacillus sp. ESL0259	8255.3	11490	12009	1507.9	6791.1	6707.7	0	4025.1
A0A3R6WCH9	9LACO	DNA primase (EC 2.7.7.101)	Lactobacillus bombicola	18624	26552	46048	16731	3089.2	35875	7507.9	5154.9
A0A484GDQ5	9GAMM	Elongation factor Tu (EF-Tu)	Candidatus Schmidhempelia bombi str. Bimp	0	19837	0	0	0	6484.6	28662	0
A0A5P1MU32	9HYME	Glyceraldehyde-3-phosphate dehydrogenase (EC 1.2.1.12)	Frieseomelitta varia	987880	871390	870690	990620	233750	194280	406690	95522
A0A6B2F305	BOTNI	Thioredoxin domain-containing protein	Bothriechis nigroviridis (Black-speckled palm pit viper)	265240	128990	255550	197660	60482	28144	52397	18677
A0A6B2F472	BOTNI	alcohol dehydrogenase (NADP(+)) (EC 1.1.1.2)	Bothriechis nigroviridis (Black-speckled palm pit viper)	11043	33399	33799	23044	28885	31097	40660	17858
A0A6B2FC56	BOTNI	Triosephosphate isomerase (EC 5.3.1.1)	Bothriechis nigroviridis (Black-speckled palm pit viper)	96048	137710	225790	135510	73411	71636	58402	27068
A0A821APD0	9NEOB	(mimic poison frog) hypothetical protein	Ranitomeya imitator (mimic poison frog)	685.98	4759.6	0	4973.9	757.34	0	2611.8	1354.8
A0A821LMA2	9NEOB	(mimic poison frog) hypothetical protein	Ranitomeya imitator (mimic poison frog)	0	0	2271.6	0	0	472.71	1607	779.28
A0A821LTU2	9NEOB	Glyceraldehyde-3-phosphate dehydrogenase (EC 1.2.1.12)	Ranitomeya imitator (mimic poison frog)	4669.4	6272.8	1981.8	3146.4	0	4436.5	1923	0
A0A821Q3K0	9NEOB	(mimic poison frog) hypothetical protein	Ranitomeya imitator (mimic poison frog)	1956.3	17571	8817	3755.1	4583.7	30336	16205	10935
A0A821TH16	9NEOB	Prohibitin	Ranitomeya imitator (mimic poison frog)	1159.9	1764.9	3422	1070.4	773.43	2207.2	601.38	491.81
A0A821WRE0	9NEOB	Proteasome subunit beta	Ranitomeya imitator (mimic poison frog)	6381.8	17879	20847	0	0	1723.2	9820.8	1919.6
A0A821YJ38	9NEOB	(mimic poison frog) hypothetical protein	Ranitomeya imitator (mimic poison frog)	4157.4	2809.9	3328.9	8902.4	2946.5	2692	3734.7	4909.1
A0A822B4D0	9NEOB	(mimic poison frog) hypothetical protein	Ranitomeya imitator (mimic poison frog)	6538.8	8176.5	13414	33055	36034	25602	6088	71506
A0A822C0E9	9NEOB	T-complex protein 1 subunit beta (CCT-beta)	Ranitomeya imitator (mimic poison frog)	11735	8191	15503	0	0	8122.7	3553	4092.8
A0A822FI73	9NEOB	(mimic poison frog) hypothetical protein	Ranitomeya imitator (mimic poison frog)	12244	12741	7423.5	3359.5	11256	8114	12196	7072.8
A0A822GLX5	9NEOB	Serotransferrin (Beta-1 metal-binding globulin) (Siderophilin)	Ranitomeya imitator (mimic poison frog)	3155.1	2509.8	2828.6	8963.8	3723.8	5763.5	693.55	4159.6
A0A822HAN2	9NEOB	(mimic poison frog) hypothetical protein	Ranitomeya imitator (mimic poison frog)	67440	82151	97362	46971	8639	0	19691	8334.5
A0A822I5U0	9NEOB	(mimic poison frog) hypothetical protein	Ranitomeya imitator (mimic poison frog)	17052	6265.2	36663	4685.9	1106.6	3595.8	15891	3768.1
A0A822I9M5	9NEOB	(mimic poison frog) hypothetical protein	Ranitomeya imitator (mimic poison frog)	19289	12103	14856	20259	26887	6072.1	22361	8330.7
A0A822I9V0	9NEOB	(mimic poison frog) hypothetical protein	Ranitomeya imitator (mimic poison frog)	100020	121280	175130	305880	173160	114090	115610	205610
A0A822IFE0	9NEOB	H(+)-transporting two-sector ATPase (EC 7.1.2.2)	Ranitomeya imitator (mimic poison frog)	0	10410	0	0	2835.4	3947.1	4954.3	1383.9
A0A833R489	9HYME	Superoxide dismutase (EC 1.15.1.1)	Frieseomelitta varia	25006	55029	18052	20616	11428	19844	23672	0
A0A833R5C8	9HYME	Lipocln_cytosolic_FA-bd_dom domain-containing protein	Frieseomelitta varia	21966	19244	17148	21691	1395.6	2065.9	12058	2027.2
A0A833R5H5	9HYME	DJ-1_PfpI domain-containing protein	Frieseomelitta varia	132050	74828	80209	64609	28482	28442	37061	16970
A0A833R7S6	9HYME	Peptidase S1 domain-containing protein	Frieseomelitta varia	8542.5	6962.4	4780.3	4892	6005.1	6421.5	5711.6	2496.7
A0A833RB33	9HYME	Transmembrane protease serine 9	Frieseomelitta varia	12477	15799	13754	9503.5	52493	2290	32628	7723.2
A0A833RCD6	9HYME	Aminopeptidase (EC 3.4.11.-)	Frieseomelitta varia	18372	22941	8702	18855	18250	13516	20171	11626
A0A833RCZ1	9HYME	Thioredoxin domain-containing protein	Frieseomelitta varia	285680	371430	239560	210870	25626	95664	182300	55843
A0A833RFX8	9HYME	Apolipophorin	Frieseomelitta varia	3224.3	1843.8	0	2835.2	0	2357.5	6618.5	5939
A0A833RKL8	9HYME	GTP-binding nuclear protein	Frieseomelitta varia	0	0	8109.6	8057.8	1402	1774.4	1228.2	0
A0A833RKT2	9HYME	alpha-glucosidase (EC 3.2.1.20)	Frieseomelitta varia	13028	2776.4	1755.8	8001.4	25716	12277	18546	14792
A0A833RL01	9HYME	Dihydrolipoyllysine-residue succinyltransferase component of 2-oxoglutarate dehydrogenase complex, mitochondrial (EC 2.3.1.61) (E2K)	Frieseomelitta varia	73.937	897.03	4528.9	0	0	1112.9	0	144.38
A0A833RMB6	9HYME	Muscle LIM protein Mlp84B	Frieseomelitta varia	53246	54120	109410	90041	17289	32179	16949	7317.3
A0A833RMX9	9HYME	Filamin-A	Frieseomelitta varia	15810	18766	27494	10477	6500.4	3663.1	6339.3	991.68
A0A833RN15	9HYME	Stress-induced-phosphoprotein 1	Frieseomelitta varia	1462.9	1627	2493.4	4306.9	0	1738.6	2538.6	835.74
A0A833RND1	9HYME	Myosin light chain alkali	Frieseomelitta varia	151050	437510	366960	188490	0	624720	78002	21247
A0A833RNG0	9HYME	Staphylococcal nuclease domain-containing protein (EC 3.1.31.1)	Frieseomelitta varia	63197	12683	88226	3212	4993.6	2194.6	20121	8987
A0A833RNQ4	9HYME	N-sulfoglucosamine sulfohydrolase	Frieseomelitta varia	1411.9	1518.7	2838	2892.8	2128.2	3651.8	3657.9	2117.6
A0A833RNQ9	9HYME	Microtubule-associated protein 2	Frieseomelitta varia	2831	2967.3	0	4197.5	693.69	0	629.94	717.51
A0A833RNR7	9HYME	Paramyosin	Frieseomelitta varia	329360	151150	131360	274730	41153	357390	176390	47285
A0A833RPK8	9HYME	Heterogeneous nuclear ribonucleoprotein R	Frieseomelitta varia	54511	77669	46152	64998	46962	52105	27485	2523.5
A0A833RRS5	9HYME	Glutathione S-transferase 1-like	Frieseomelitta varia	4303.7	7768.4	3245.6	4660	3044.4	4398.3	6896.9	3356.3
A0A833RSE1	9HYME	Heat shock protein 83	Frieseomelitta varia	4343.7	0	11665	11003	12777	8394.3	4493.9	9361.3
A0A833RSF2	9HYME	Succinate dehydrogenase [ubiquinone] flavoprotein subunit, mitochondrial (EC 1.3.5.1)	Frieseomelitta varia	6345.9	5782.6	17661	16802	0	15279	5883.4	0
A0A833RSJ3	9HYME	ADP/ATP translocase (ADP,ATP carrier protein)	Frieseomelitta varia	0	10221	14487	8165	1260.8	12902	0	925.54
A0A833RU32	9HYME	guanylate cyclase (EC 4.6.1.2)	Frieseomelitta varia	0	10612	13274	4423.1	1353.5	5483.6	0	2087.2
A0A833RUN1	9HYME	Heat shock 70 kDa protein cognate 4	Frieseomelitta varia	7875.4	6611.8	9600	4826.6	2210.5	3330.3	4588.6	2982.2
A0A833RVQ9	9HYME	Aldo_ket_red domain-containing protein	Frieseomelitta varia	253140	223640	378260	170840	144280	201570	320070	214930
A0A833RXQ9	9HYME	NADH dehydrogenase [ubiquinone] flavoprotein 2, mitochondrial	Frieseomelitta varia	4273.7	3940.3	0	4542.9	471.59	4036.4	0	208.63
A0A833RY46	9HYME	Lamin-C	Frieseomelitta varia	6473.7	17032	8226.5	6908.5	3868.4	3924.2	13750	2308.3
A0A833RYJ0	9HYME	Endophilin-A (SH3 domain-containing GRB2-like protein)	Frieseomelitta varia	3116.9	0	7993	6147.9	1326.5	1707.8	0	1072.9
A0A833RZB6	9HYME	Laminin subunit alpha	Frieseomelitta varia	9732	0	3355.4	4811.2	3464.3	0	4602.1	1257.1
A0A833S1K4	9HYME	Malic enzyme	Frieseomelitta varia	37471	39851	38473	29772	5968.5	7477	34592	8223.8
A0A833S2V2	9HYME	Proteasome subunit alpha type	Frieseomelitta varia	0	7462.3	9032.7	7764.9	0	3117.1	9433.6	0
A0A833S3B6	9HYME	RNA helicase (EC 3.6.4.13)	Frieseomelitta varia	3214	3520.8	1340.5	0	3317.2	3638.3	8546.8	832.1
A0A833S5I5	9HYME	Phosphoglycerate kinase (EC 2.7.2.3)	Frieseomelitta varia	110870	120430	138130	141140	27322	64035	53817	15630
A0A833S6T1	9HYME	Carboxypeptidase B	Frieseomelitta varia	28041	30737	0	16171	37887	15739	18562	15500
A0A833S6V3	9HYME	Neurochondrin homolog	Frieseomelitta varia	7941.2	11887	9606.8	7167.7	700.94	2806.6	954.06	1743.5
A0A833S7R5	9HYME	Twitchin	Frieseomelitta varia	96358	62976	59408	83071	44834	88230	32115	15965
A0A833S8G1	9HYME	Aminopeptidase (EC 3.4.11.-)	Frieseomelitta varia	5485.9	16857	11228	6887.3	7072.3	8783.7	9707.8	0
A0A833S8J0	9HYME	NTF2 domain-containing protein	Frieseomelitta varia	13048	21565	9454	17835	8600.1	0	17893	5417.4
A0A833S8P7	9HYME	ADF-H domain-containing protein	Frieseomelitta varia	319530	390820	385400	254060	205180	123960	203730	32079
A0A833SA96	9HYME	Nucleoside diphosphate kinase (EC 2.7.4.6)	Frieseomelitta varia	105490	65718	99414	49560	21419	49754	78350	21077
A0A833SBP4	9HYME	Gal_mutarotas_2 domain-containing protein	Frieseomelitta varia	1052.2	155.57	0	5053.9	7500.4	1994.4	1860.2	2727.4
A0A833SBT7	9HYME	Succinate--CoA ligase [ADP-forming] subunit beta, mitochondrial (EC 6.2.1.5) (Succinyl-CoA synthetase beta chain) (SCS-beta)	Frieseomelitta varia	20628	8472	7760.9	15516	0	5932.1	8552.9	4753
A0A833SC01	9HYME	Glycerol-3-phosphate dehydrogenase (EC 1.1.5.3)	Frieseomelitta varia	33872	15937	25041	30595	4244.7	28599	9838.1	18792
A0A833SC55	9HYME	Rab GDP dissociation inhibitor	Frieseomelitta varia	6845.3	5917.3	9192.4	5934.9	6607.4	2060.7	1854.6	12478
A0A833SDV3	9HYME	Paxillin	Frieseomelitta varia	11532	15948	33800	3840.3	0	4089.5	0	1967.5
A0A833SE01	9HYME	Translocon-associated protein subunit gamma (Signal sequence receptor subunit gamma)	Frieseomelitta varia	199000	301440	167490	214750	473820	348750	376500	166130
A0A833SEP6	9HYME	Transket_pyr domain-containing protein	Frieseomelitta varia	209300	173720	113730	96232	102290	62883	191150	61291
A0A833SGG6	9HYME	Adenosylhomocysteinase (EC 3.3.1.1)	Frieseomelitta varia	0	2092.7	5161.9	7980	3911.4	3679.5	3470.2	982.73
A0A833SK77	9HYME	Glycogen debranching enzyme (EC 2.4.1.25) (EC 3.2.1.33) (Glycogen debrancher)	Frieseomelitta varia	8580	15162	8474.2	4774	6331.7	11494	4712.9	335.49
A0A833SMS6	9HYME	Malic enzyme	Frieseomelitta varia	11205	0	7867.1	8990.1	8000	0	6927.7	955.28
A0A833SMW3	9HYME	Tubulin alpha chain	Frieseomelitta varia	4060.3	7438.6	69486	71268	7028.5	42557	33296	2299
A0A833VIQ1	9HYME	Calmodulin	Frieseomelitta varia	15637	23165	15100	12595	19631	17369	20707	14491
A0A833VMV6	9HYME	Eukaryotic translation initiation factor 5A (eIF-5A)	Frieseomelitta varia	8548.6	27674	34013	24963	4801.3	6486.5	7694.8	3885.1
A0A833VPL6	9HYME	EF-hand domain-containing protein	Frieseomelitta varia	2484.2	0	9380.2	0	1658.1	2322.8	0	850.4
A0A833VPP9	9HYME	ornithine aminotransferase (EC 2.6.1.13) (Ornithine--oxo-acid aminotransferase)	Frieseomelitta varia	4936.5	4387.3	0	1030.6	7468.2	4397.4	6836.6	1457.1
A0A833VQ28	9HYME	40S ribosomal protein S4	Frieseomelitta varia	21529	31941	38507	12794	370.77	1945.5	9741.4	4123.2
A0A833VR32	9HYME	EF-1-gamma C-terminal domain-containing protein	Frieseomelitta varia	5243.1	3184.9	9739.2	4204	0	427.68	2378.4	748.98
A0A833VS22	9HYME	Actin	Frieseomelitta varia	510430	147740	164440	571080	19073	319180	83432	29642
A0A833VV22	9HYME	WD_REPEATS_REGION domain-containing protein	Frieseomelitta varia	95245	82238	103660	72288	22242	32026	75525	10360
A0A833VVD0	9HYME	Isocitrate dehydrogenase [NAD] subunit, mitochondrial	Frieseomelitta varia	8926	7632.1	18526	12849	1097.7	2991.2	2863.3	1749.1
A0A833VVP7	9HYME	Polyadenylate-binding protein (PABP)	Frieseomelitta varia	2611.1	0	4731.9	0	0	0	494.37	0
A0A833VWW5	9HYME	Catalase (EC 1.11.1.6)	Frieseomelitta varia	11578	23193	9263.2	406.24	8414.9	7867.8	9154.2	2069.3
A0A833VXK1	9HYME	Myosin heavy chain, muscle	Frieseomelitta varia	0	5361.2	6132.7	0	2963.1	6969.8	5446.8	4089
A0A833VXN5	9HYME	Heat shock 70 kDa protein cognate 4	Frieseomelitta varia	2896	1629.1	0	855.74	1690.1	3344.3	5023.3	2554.5
A0A833W1X0	9HYME	Alpha-galactosidase (EC 3.2.1.-)	Frieseomelitta varia	34734	28711	20426	26927	138260	61963	118330	53773
A0A833W2V6	9HYME	Ras-related protein Rab-43	Frieseomelitta varia	23395	31714	13267	27710	10676	20606	15800	4783.3
A0A833W2V9	9HYME	Fructose-bisphosphate aldolase (EC 4.1.2.13)	Frieseomelitta varia	27736	52023	36996	45511	18722	30917	16870	8151.2
A0A833W593	9HYME	Titin	Frieseomelitta varia	75190	69835	46920	38444	94792	60728	85255	20251
A0A833W6G6	9HYME	Pyruvate kinase (EC 2.7.1.40)	Frieseomelitta varia	305500	252910	264980	255850	149840	65060	160230	56323
A0A833W6L4	9HYME	Small nuclear ribonucleoprotein-associated protein	Frieseomelitta varia	6098	7495	2548.3	6034.9	0	0	4988.7	532.35
A0A833W8Q7	9HYME	6-phosphogluconate dehydrogenase, decarboxylating (EC 1.1.1.44)	Frieseomelitta varia	11579	25041	71512	65914	34913	4516.6	0	3254.7
A0A833W9A3	9HYME	Proteasome subunit alpha type	Frieseomelitta varia	10539	15812	3206.2	10586	5274.7	9175.6	12364	3838.7
A0A833W9E6	9HYME	Dihydrolipoyl dehydrogenase (EC 1.8.1.4)	Frieseomelitta varia	37578	41662	47469	70169	31973	39608	27316	13723
A0A833WAD3	9HYME	Annexin	Frieseomelitta varia	4850.6	13230	12325	8031.9	5504.7	4674.9	6907.5	6768.7
A0A833WD27	9HYME	Pyruvate dehydrogenase E1 component subunit beta (EC 1.2.4.1)	Frieseomelitta varia	15835	23256	59619	37602	10397	12818	11889	4659.7
A0A833WDK7	9HYME	Calreticulin	Frieseomelitta varia	19296	15839	16506	12086	3825.8	8305.2	13950	5727.8
A0A833WDX6	9HYME	Heat shock protein 60	Frieseomelitta varia	38105	88027	66998	87813	20266	59059	77081	38254
A0A833WFE3	9HYME	Calcium-transporting ATPase (EC 7.2.2.10)	Frieseomelitta varia	7042.5	11461	85266	27454	1896.6	18281	8163.2	2417.8
A0A833WFT3	9HYME	Thioredoxin domain-containing protein	Frieseomelitta varia	45497	45550	68605	61121	15507	29806	48328	18160
C0HLL3	VESVE	Phospholipase A1 (PLA1) (EC 3.1.1.32) (Vesp v 1)	Vespa velutina (Asian yellow-legged hornet)	199630	193720	229200	646430	54678000	11794000	1436300	75719000
C0HLL4	VESVE	Hyaluronidase A (EC 3.2.1.35) (Vesp v 2A)	Vespa velutina (Asian yellow-legged hornet)	764340	1209900	338150	864970	2648000	1338800	1253000	2144900
C0HLL5	VESVE	Hyaluronidase B (EC 3.2.1.35) (Vesp v 2B)	Vespa velutina (Asian yellow-legged hornet)	32269	14588	35104	39101	32973	29619	35481	36474
C0IPU3	9HYME	Phosphoenolpyruvate carboxykinase	Xylocopa caerulea	29198	45698	38505	66885	0	0	9149.7	1731.5
G9I553	MEGRT	14-3-3 zeta	Megachile rotundata (Alfalfa leafcutting bee)	59993	107210	141120	44774	42834	41528	34009	2738.3
P0DMB8	VESVE	Phospholipase A1 verutoxin-2b (PLA1) (VT-2b) (EC 3.1.1.32) (EC 3.1.1.5)	Vespa velutina (Asian yellow-legged hornet)	13312	10446	13022	21724	17090	29662	10671	90005
P0DMB9	VESVE	Venom allergen 5 (Antigen 5) (allergen Vesp v 5)	Vespa velutina (Asian yellow-legged hornet)	158780	203660	150610	287800	4561300	1767500	3566900	5808900
Q17TA6	9HYME	arginine kinase (EC 2.7.3.3)	Bombus festivus	246060	344930	422780	363410	222830	208770	276430	39058
Q1WHC2	DENAT	Histone H3	Dendrobates auratus (Green and black poison dart frog)	96701	63257	21843	24001	3288.1	33296	59637	2920.6
Q7YXM5	APILI	Superoxide dismutase (EC 1.15.1.1)	Apis mellifera ligustica (Common honeybee) (Italian honeybee)	29171	39532	20370	8981.3	13973	19387	14115	19143
Q7YXM6	APILI	Superoxide dismutase [Cu-Zn] (EC 1.15.1.1)	Apis mellifera ligustica (Common honeybee) (Italian honeybee)	157520	284940	230340	121780	370130	201500	308840	71183
Q86PH6	APIME	Transferrin	Apis mellifera (Honeybee)	26187	17111	26901	21748	15610	7467.8	33501	10228
Q8B3M2	9VIRU	Genome polyprotein	Deformed wing virus	1975.6	3249.4	8065.3	2948.6	2880	4298.3	4933.2	3136.3
R9QKY2	BOMHU	Glucose-6-phosphate isomerase (EC 5.3.1.9)	Bombus humilis (Brown-banded carder bee)	25628	38652	17641	22688	23835	24468	54263	11485
V9W8E0	9BACL	Phage protein	Paenibacillus larvae subsp. larvae DSM 25430	12952	20317	28464	36324	8100	15405	9002.1	12463

## Sheet: FoldChange_SQvsSW
Uniprot code	Group	p-value	Fold Change	Protein names	Organism
A0A0L0AMD2	9ENTR	0.338065	2.70295	Porin	Klebsiella sp. RIT-PI-d
A0A0L0AQN9	9ENTR	0.229032	1.53937	Major outer membrane lipoprotein Lpp	Klebsiella sp. RIT-PI-d
A0A0L0AW36	9ENTR	0.0605576	1.87723	Enolase (EC 4.2.1.11) (2-phospho-D-glycerate hydro-lyase) (2-phosphoglycerate dehydratase)	Klebsiella sp. RIT-PI-d
A0A0L0BDD6	9PSED	0.442876	1.32396	Lipoprotein	Pseudomonas sp. RIT-PI-a
A0A154NWX1	DUFNO	0.0199201	6.45169	Laminin subunit beta-1	Dufourea novaeangliae (Sweat bee)
A0A154NXS4	DUFNO	0.384383	1.94268	Troponin I	Dufourea novaeangliae (Sweat bee)
A0A154NYM3	DUFNO	0.000614731	16.5383	Transgelin	Dufourea novaeangliae (Sweat bee)
A0A154P037	DUFNO	0.967157	0.988044	Lambda-crystallin like protein	Dufourea novaeangliae (Sweat bee)
A0A154P1L6	DUFNO	0.0185326	2.38935	ATP synthase subunit beta (EC 7.1.2.2)	Dufourea novaeangliae (Sweat bee)
A0A154P1Q6	DUFNO	0.130356	11.5072	Elongation factor 1-alpha	Dufourea novaeangliae (Sweat bee)
A0A154P289	DUFNO	0.0155441	1.99363	Vacuolar proton pump subunit B (V-ATPase subunit B) (Vacuolar proton pump subunit B)	Dufourea novaeangliae (Sweat bee)
A0A154P296	DUFNO	0.0274207	2.64389	Acetyl-CoA hydrolase (EC 3.1.2.1) (Acetyl-CoA deacylase)	Dufourea novaeangliae (Sweat bee)
A0A154P3I0	DUFNO	0.059352	1.93254	Proteasome subunit alpha type	Dufourea novaeangliae (Sweat bee)
A0A154P3Q8	DUFNO	0.0277397	2.00309	Elongation factor 2	Dufourea novaeangliae (Sweat bee)
A0A154P3S2	DUFNO	0.00278246	2.33519	Muscle M-line assembly protein unc-89	Dufourea novaeangliae (Sweat bee)
A0A154P4T7	DUFNO	0.00963446	28.5717	Four and a half LIM domains protein 2	Dufourea novaeangliae (Sweat bee)
A0A154P559	DUFNO	0.198173	1.67038	Glucose dehydrogenase [acceptor]	Dufourea novaeangliae (Sweat bee)
A0A154P796	DUFNO	0.00646433	2.61222	Spectrin alpha chain	Dufourea novaeangliae (Sweat bee)
A0A154PA13	DUFNO	0.545231	1.25367	Chitinase-like protein Idgf4	Dufourea novaeangliae (Sweat bee)
A0A154PAT6	DUFNO	0.0435743	2.55171	Malate dehydrogenase (EC 1.1.1.37)	Dufourea novaeangliae (Sweat bee)
A0A154PBQ9	DUFNO	0.984363	0.99117	Putative enoyl-CoA hydratase, mitochondrial	Dufourea novaeangliae (Sweat bee)
A0A154PD98	DUFNO	0.00242127	4.46988	Nidogen-1	Dufourea novaeangliae (Sweat bee)
A0A154PEK6	DUFNO	0.0935336	1.62296	Citrate synthase	Dufourea novaeangliae (Sweat bee)
A0A154PFC9	DUFNO	0.149403	0.321165	Ornithine aminotransferase (EC 2.6.1.13)	Dufourea novaeangliae (Sweat bee)
A0A154PH15	DUFNO	0.805761	1.18202	Vinculin	Dufourea novaeangliae (Sweat bee)
A0A154PH44	DUFNO	0.202089	1.96779	Glycerol-3-phosphate dehydrogenase [NAD(+)] (EC 1.1.1.8)	Dufourea novaeangliae (Sweat bee)
A0A154PHR8	DUFNO	0.126491	4.44527	Coronin	Dufourea novaeangliae (Sweat bee)
A0A154PIM3	DUFNO	0.130137	1.39024	Twitchin	Dufourea novaeangliae (Sweat bee)
A0A154PJJ4	DUFNO	0.00207771	3.62681	Annexin	Dufourea novaeangliae (Sweat bee)
A0A154PJP5	DUFNO	0.0186163	2.16982	Titin	Dufourea novaeangliae (Sweat bee)
A0A154PJQ2	DUFNO	0.578156	1.22695	alpha-L-fucosidase (EC 3.2.1.51)	Dufourea novaeangliae (Sweat bee)
A0A154PJR5	DUFNO	0.240166	1.37687	Filamin-A	Dufourea novaeangliae (Sweat bee)
A0A154PJZ1	DUFNO	0.108091	2.06287	Paramyosin, long form	Dufourea novaeangliae (Sweat bee)
A0A154PKM2	DUFNO	0.868867	1.1393	Phosphotransferase (EC 2.7.1.-)	Dufourea novaeangliae (Sweat bee)
A0A154PKU8	DUFNO	0.241171	1.71201	Malic enzyme	Dufourea novaeangliae (Sweat bee)
A0A154PLJ1	DUFNO	0.00696989	4.37516	Heat shock 70 kDa protein cognate 5	Dufourea novaeangliae (Sweat bee)
A0A154PMG3	DUFNO	0.622783	0.710669	Phosphoglycerate mutase (EC 5.4.2.11) (EC 5.4.2.4)	Dufourea novaeangliae (Sweat bee)
A0A154PMQ1	DUFNO	0.968456	1.02771	Aminopeptidase (EC 3.4.11.-)	Dufourea novaeangliae (Sweat bee)
A0A154PN63	DUFNO	0.88851	1.04715	Malate dehydrogenase (EC 1.1.1.37)	Dufourea novaeangliae (Sweat bee)
A0A154PNQ0	DUFNO	0.0172551	2.53537	Sortilin-related receptor (Low-density lipoprotein receptor relative with 11 ligand-binding repeats) (Sorting protein-related receptor containing LDLR class A repeats)	Dufourea novaeangliae (Sweat bee)
A0A154PP88	DUFNO	0.00820029	3.35956	Alpha-1,4 glucan phosphorylase (EC 2.4.1.1)	Dufourea novaeangliae (Sweat bee)
A0A154PPS0	DUFNO	0.0307651	1.92961	phosphopyruvate hydratase (EC 4.2.1.11) (2-phospho-D-glycerate hydro-lyase)	Dufourea novaeangliae (Sweat bee)
A0A154PQ04	DUFNO	0.0891081	3.42672	Fructose-bisphosphate aldolase (EC 4.1.2.13)	Dufourea novaeangliae (Sweat bee)
A0A154PQ65	DUFNO	0.0406474	2.15778	Multifunctional fusion protein [Includes: L-glutamate gamma-semialdehyde dehydrogenase (EC 1.2.1.88) (L-glutamate gamma-semialdehyde dehydrogenase); Delta-1-pyrroline-5-carboxylate dehydrogenase (P5C dehydrogenase)]	Dufourea novaeangliae (Sweat bee)
A0A154PQA1	DUFNO	0.360685	2.01547	Myofilin	Dufourea novaeangliae (Sweat bee)
A0A154PQH0	DUFNO	0.00406154	2.69325	Glycogenin-1	Dufourea novaeangliae (Sweat bee)
A0A154PQS0	DUFNO	0.166546	1.81833	H(+)-transporting two-sector ATPase (EC 7.1.2.2)	Dufourea novaeangliae (Sweat bee)
A0A154PS34	DUFNO	0.0604571	11.3758	PDZ and LIM domain protein Zasp	Dufourea novaeangliae (Sweat bee)
A0A154PS68	DUFNO	0.319886	1.3976	Dystonin	Dufourea novaeangliae (Sweat bee)
A0A154PS72	DUFNO	0.0113982	9.23335	Profilin	Dufourea novaeangliae (Sweat bee)
A0A154PSQ8	DUFNO	0.487805	1.54407	Myosin heavy chain, muscle	Dufourea novaeangliae (Sweat bee)
A0A1B1JID1	APIME	0.806305	1.15239	Superoxide dismutase [Cu-Zn] (EC 1.15.1.1)	Apis mellifera (Honeybee)
A0A1T4LCN6	ENTAG	0.717227	0.824282	Glyceraldehyde-3-phosphate dehydrogenase (EC 1.2.1.-)	Enterobacter agglomerans (Erwinia herbicola) (Pantoea agglomerans)
A0A1V9X4H1	9ACAR	0.145992	3.73802	vesicle-fusing ATPase (EC 3.6.4.6)	Tropilaelaps mercedesae
A0A1V9XK33	9ACAR	0.0130761	2.03399	14-3-3 protein zeta-like	Tropilaelaps mercedesae
A0A1V9XK41	9ACAR	0.0773555	2.21662	Glycerol-3-phosphate dehydrogenase [NAD(+)] (EC 1.1.1.8)	Tropilaelaps mercedesae
A0A1V9XXZ1	9ACAR	0.253384	2.17646	Histone H4	Tropilaelaps mercedesae
A0A1V9Y337	9ACAR	0.371945	1.19394	Filamin-C-like	Tropilaelaps mercedesae
A0A2A3E214	APICC	0.67689	0.682764	alpha-L-fucosidase (EC 3.2.1.51)	Apis cerana cerana (Oriental honeybee)
A0A2A3E250	APICC	0.461793	1.71706	Antitrypsin	Apis cerana cerana (Oriental honeybee)
A0A2A3E292	APICC	0.139095	1.42226	Glutathione S-transferase	Apis cerana cerana (Oriental honeybee)
A0A2A3E2K9	APICC	0.543278	1.31897	1,4-alpha-glucan branching enzyme (EC 2.4.1.18)	Apis cerana cerana (Oriental honeybee)
A0A2A3E2U1	APICC	0.938255	1.04749	Zinc carboxypeptidase A	Apis cerana cerana (Oriental honeybee)
A0A2A3E2W8	APICC	0.0188297	3.23391	Pyruvate dehydrogenase E1 component subunit alpha (EC 1.2.4.1)	Apis cerana cerana (Oriental honeybee)
A0A2A3E3Z9	APICC	0.11113	1.68639	Triosephosphate isomerase (EC 5.3.1.1)	Apis cerana cerana (Oriental honeybee)
A0A2A3E464	APICC	0.025374	2.02819	ATP synthase subunit alpha	Apis cerana cerana (Oriental honeybee)
A0A2A3E509	APICC	0.284057	1.57303	Glyceraldehyde-3-phosphate dehydrogenase (EC 1.2.1.12)	Apis cerana cerana (Oriental honeybee)
A0A2A3E5F8	APICC	0.332437	83.9867	Transgelin	Apis cerana cerana (Oriental honeybee)
A0A2A3E5U7	APICC	0.0201312	2.28502	Talin-2	Apis cerana cerana (Oriental honeybee)
A0A2A3E6T3	APICC	0.108536	4.41216	Muscle LIM protein Mlp84B	Apis cerana cerana (Oriental honeybee)
A0A2A3E744	APICC	0.0948082	2.19449	Pyruvate carboxylase (EC 6.4.1.1)	Apis cerana cerana (Oriental honeybee)
A0A2A3E7B2	APICC	0.320224	1.55311	Alpha-1,4 glucan phosphorylase (EC 2.4.1.1)	Apis cerana cerana (Oriental honeybee)
A0A2A3E7C0	APICC	0.17095	0.44096	Trehalase (EC 3.2.1.28) (Alpha-trehalose glucohydrolase)	Apis cerana cerana (Oriental honeybee)
A0A2A3E7D0	APICC	0.12632	1.65961	Disorganized muscle protein	Apis cerana cerana (Oriental honeybee)
A0A2A3E811	APICC	0.518799	0.659133	Titin	Apis cerana cerana (Oriental honeybee)
A0A2A3E889	APICC	0.523047	0.547278	Hexamerin	Apis cerana cerana (Oriental honeybee)
A0A2A3E8D4	APICC	0.413494	1.70092	Myosin heavy chain, muscle	Apis cerana cerana (Oriental honeybee)
A0A2A3E8J6	APICC	0.111709	2.59902	UTP--glucose-1-phosphate uridylyltransferase (EC 2.7.7.9)	Apis cerana cerana (Oriental honeybee)
A0A2A3E8T5	APICC	0.844536	1.17103	Actin	Apis cerana cerana (Oriental honeybee)
A0A2A3E9Y7	APICC	0.26615	4.60472	glutamine synthetase (EC 6.3.1.2)	Apis cerana cerana (Oriental honeybee)
A0A2A3EA22	APICC	0.00806187	7.73656	Four and a half LIM domains protein	Apis cerana cerana (Oriental honeybee)
A0A2A3EA59	APICC	0.220306	0.399504	alpha-glucosidase (EC 3.2.1.20)	Apis cerana cerana (Oriental honeybee)
A0A2A3EAL0	APICC	0.043593	0.281081	Zinc finger protein-like 1 homolog	Apis cerana cerana (Oriental honeybee)
A0A2A3EBK6	APICC	0.00423099	61.974	LIM domain-binding protein	Apis cerana cerana (Oriental honeybee)
A0A2A3EC59	APICC	0.000366389	3.74534	Calpain-A	Apis cerana cerana (Oriental honeybee)
A0A2A3ECU3	APICC	0.203641	2.39331	Troponin T	Apis cerana cerana (Oriental honeybee)
A0A2A3EDC1	APICC	0.927377	0.973628	Tropomyosin-1	Apis cerana cerana (Oriental honeybee)
A0A2A3EDI2	APICC	0.427697	1.27706	Aconitate hydratase, mitochondrial (Aconitase) (EC 4.2.1.3)	Apis cerana cerana (Oriental honeybee)
A0A2A3EDV5	APICC	0.132096	6.69243	Ribosomal protein L15	Apis cerana cerana (Oriental honeybee)
A0A2A3EF66	APICC	0.225994	1.44419	Filamin-B	Apis cerana cerana (Oriental honeybee)
A0A2A3EGD2	APICC	0.0221774	2.72415	arginine kinase (EC 2.7.3.3)	Apis cerana cerana (Oriental honeybee)
A0A2A3EH73	APICC	0.535306	1.19636	Titin	Apis cerana cerana (Oriental honeybee)
A0A2A3EHE9	APICC	0.145072	7.38986	ANK_REP_REGION domain-containing protein	Apis cerana cerana (Oriental honeybee)
A0A2A3EHJ9	APICC	0.157411	1.43602	Tropomyosin	Apis cerana cerana (Oriental honeybee)
A0A2A3EJ73	APICC	0.161022	0.688531	Transaldolase (EC 2.2.1.2)	Apis cerana cerana (Oriental honeybee)
A0A2A3EJN3	APICC	0.00831355	0.0121059	Beta-galactosidase (EC 3.2.1.23) (Acid beta-galactosidase)	Apis cerana cerana (Oriental honeybee)
A0A2A3EJU2	APICC	0.415321	2.02384	Retinal dehydrogenase	Apis cerana cerana (Oriental honeybee)
A0A2A3EKS3	APICC	0.0491287	2.58297	Fructose-bisphosphate aldolase (EC 4.1.2.13)	Apis cerana cerana (Oriental honeybee)
A0A2A3EL86	APICC	0.0289218	5.91697	Elongation factor 1-gamma	Apis cerana cerana (Oriental honeybee)
A0A2A3EL94	APICC	0.819157	1.07715	Dihydrolipoyl dehydrogenase (EC 1.8.1.4)	Apis cerana cerana (Oriental honeybee)
A0A2A3ELF2	APICC	0.744497	0.789906	Dihydrolipoyllysine-residue acetyltransferase component of pyruvate dehydrogenase complex	Apis cerana cerana (Oriental honeybee)
A0A2A3EMK6	APICC	0.00118319	2.71863	Alpha-actinin, sarcomeric	Apis cerana cerana (Oriental honeybee)
A0A2A3EPL5	APICC	0.422885	3.00417	Tubulin beta-4 chain	Apis cerana cerana (Oriental honeybee)
A0A2A3EPX9	APICC	0.0258301	2.04233	glutamate dehydrogenase [NAD(P)(+)] (EC 1.4.1.3)	Apis cerana cerana (Oriental honeybee)
A0A2A3ERL8	APICC	0.112443	1.7224	Ubiquitin	Apis cerana cerana (Oriental honeybee)
A0A2A3ESV8	APICC	0.243197	1.53411	alpha-glucosidase (EC 3.2.1.20)	Apis cerana cerana (Oriental honeybee)
A0A2A3ESZ0	APICC	0.650477	1.28357	Apolipophorin	Apis cerana cerana (Oriental honeybee)
A0A2V1YN43	ENTAG	0.0603625	2.13548	Outer membrane protein A (Outer membrane porin A)	Enterobacter agglomerans (Erwinia herbicola) (Pantoea agglomerans)
A0A2V4DR27	9GAMM	0.916988	1.0421	2,5-diketo-D-gluconic acid reductase	Gilliamella apis
A0A3M0PGI6	9LACO	0.223046	1.89812	Carbamoyl-phosphate synthase large chain (EC 6.3.5.5) (Carbamoyl-phosphate synthetase ammonia chain)	Lactobacillus sp. ESL0259
A0A3R6WCH9	9LACO	0.217163	2.09108	DNA primase (EC 2.7.7.101)	Lactobacillus bombicola
A0A484GDQ5	9GAMM	0.665242	0.564404	Elongation factor Tu (EF-Tu)	Candidatus Schmidhempelia bombi str. Bimp
A0A5P1MU32	9HYME	7.70021e-05	3.99956	Glyceraldehyde-3-phosphate dehydrogenase (EC 1.2.1.12)	Frieseomelitta varia
A0A6B2F305	BOTNI	0.00196755	5.30643	Thioredoxin domain-containing protein	Bothriechis nigroviridis (Black-speckled palm pit viper)
A0A6B2F472	BOTNI	0.56793	0.854726	alcohol dehydrogenase (NADP(+)) (EC 1.1.1.2)	Bothriechis nigroviridis (Black-speckled palm pit viper)
A0A6B2FC56	BOTNI	0.0211899	2.58139	Triosephosphate isomerase (EC 5.3.1.1)	Bothriechis nigroviridis (Black-speckled palm pit viper)
A0A821APD0	9NEOB	0.356329	2.20568	(mimic poison frog) hypothetical protein	Ranitomeya imitator (mimic poison frog)
A0A821LMA2	9NEOB	0.293189	0.517226	(mimic poison frog) hypothetical protein	Ranitomeya imitator (mimic poison frog)
A0A821LTU2	9NEOB	0.691077	1.21735	Glyceraldehyde-3-phosphate dehydrogenase (EC 1.2.1.12)	Ranitomeya imitator (mimic poison frog)
A0A821Q3K0	9NEOB	0.831502	0.794539	(mimic poison frog) hypothetical protein	Ranitomeya imitator (mimic poison frog)
A0A821TH16	9NEOB	0.262612	1.82068	Prohibitin	Ranitomeya imitator (mimic poison frog)
A0A821WRE0	9NEOB	0.190046	3.35035	Proteasome subunit beta	Ranitomeya imitator (mimic poison frog)
A0A821YJ38	9NEOB	0.438585	1.34422	(mimic poison frog) hypothetical protein	Ranitomeya imitator (mimic poison frog)
A0A822B4D0	9NEOB	0.241378	0.439446	(mimic poison frog) hypothetical protein	Ranitomeya imitator (mimic poison frog)
A0A822C0E9	9NEOB	0.232653	2.2468	T-complex protein 1 subunit beta (CCT-beta)	Ranitomeya imitator (mimic poison frog)
A0A822FI73	9NEOB	0.786282	0.925705	(mimic poison frog) hypothetical protein	Ranitomeya imitator (mimic poison frog)
A0A822GLX5	9NEOB	0.134707	2.52702	Serotransferrin (Beta-1 metal-binding globulin) (Siderophilin)	Ranitomeya imitator (mimic poison frog)
A0A822HAN2	9NEOB	0.00137572	8.01657	(mimic poison frog) hypothetical protein	Ranitomeya imitator (mimic poison frog)
A0A822I5U0	9NEOB	0.258801	2.65441	(mimic poison frog) hypothetical protein	Ranitomeya imitator (mimic poison frog)
A0A822I9M5	9NEOB	0.900553	1.04488	(mimic poison frog) hypothetical protein	Ranitomeya imitator (mimic poison frog)
A0A822I9V0	9NEOB	0.664214	1.15423	(mimic poison frog) hypothetical protein	Ranitomeya imitator (mimic poison frog)
A0A822IFE0	9NEOB	0.81108	0.793406	H(+)-transporting two-sector ATPase (EC 7.1.2.2)	Ranitomeya imitator (mimic poison frog)
A0A833R489	9HYME	0.163808	2.16038	Superoxide dismutase (EC 1.15.1.1)	Frieseomelitta varia
A0A833R5C8	9HYME	0.00140958	4.56206	Lipocln_cytosolic_FA-bd_dom domain-containing protein	Frieseomelitta varia
A0A833R5H5	9HYME	0.00841351	3.16969	DJ-1_PfpI domain-containing protein	Frieseomelitta varia
A0A833R7S6	9HYME	0.406912	1.22012	Peptidase S1 domain-containing protein	Frieseomelitta varia
A0A833RB33	9HYME	0.387548	0.541695	Transmembrane protease serine 9	Frieseomelitta varia
A0A833RCD6	9HYME	0.726314	1.08351	Aminopeptidase (EC 3.4.11.-)	Frieseomelitta varia
A0A833RCZ1	9HYME	0.00866848	3.08135	Thioredoxin domain-containing protein	Frieseomelitta varia
A0A833RFX8	9HYME	0.345802	0.529892	Apolipophorin	Frieseomelitta varia
A0A833RKL8	9HYME	0.260097	3.67054	GTP-binding nuclear protein	Frieseomelitta varia
A0A833RKT2	9HYME	0.0265442	0.35835	alpha-glucosidase (EC 3.2.1.20)	Frieseomelitta varia
A0A833RL01	9HYME	0.373747	4.37443	Dihydrolipoyllysine-residue succinyltransferase component of 2-oxoglutarate dehydrogenase complex, mitochondrial (EC 2.3.1.61) (E2K)	Frieseomelitta varia
A0A833RMB6	9HYME	0.00761767	4.16112	Muscle LIM protein Mlp84B	Frieseomelitta varia
A0A833RMX9	9HYME	0.0109469	4.14681	Filamin-A	Frieseomelitta varia
A0A833RN15	9HYME	0.210974	1.93433	Stress-induced-phosphoprotein 1	Frieseomelitta varia
A0A833RND1	9HYME	0.545795	1.58018	Myosin light chain alkali	Frieseomelitta varia
A0A833RNG0	9HYME	0.164448	4.60973	Staphylococcal nuclease domain-containing protein (EC 3.1.31.1)	Frieseomelitta varia
A0A833RNQ4	9HYME	0.27298	0.74955	N-sulfoglucosamine sulfohydrolase	Frieseomelitta varia
A0A833RNQ9	9HYME	0.0701618	4.89716	Microtubule-associated protein 2	Frieseomelitta varia
A0A833RNR7	9HYME	0.482353	1.4249	Paramyosin	Frieseomelitta varia
A0A833RPK8	9HYME	0.0727568	1.88517	Heterogeneous nuclear ribonucleoprotein R	Frieseomelitta varia
A0A833RRS5	9HYME	0.677781	1.12895	Glutathione S-transferase 1-like	Frieseomelitta varia
A0A833RSE1	9HYME	0.562727	0.771195	Heat shock protein 83	Frieseomelitta varia
A0A833RSF2	9HYME	0.237198	2.20153	Succinate dehydrogenase [ubiquinone] flavoprotein subunit, mitochondrial (EC 1.3.5.1)	Frieseomelitta varia
A0A833RSJ3	9HYME	0.341955	2.17876	ADP/ATP translocase (ADP,ATP carrier protein)	Frieseomelitta varia
A0A833RU32	9HYME	0.182953	3.17211	guanylate cyclase (EC 4.6.1.2)	Frieseomelitta varia
A0A833RUN1	9HYME	0.0125619	2.2052	Heat shock 70 kDa protein cognate 4	Frieseomelitta varia
A0A833RVQ9	9HYME	0.550081	1.16464	Aldo_ket_red domain-containing protein	Frieseomelitta varia
A0A833RXQ9	9HYME	0.211072	2.70466	NADH dehydrogenase [ubiquinone] flavoprotein 2, mitochondrial	Frieseomelitta varia
A0A833RY46	9HYME	0.345658	1.62006	Lamin-C	Frieseomelitta varia
A0A833RYJ0	9HYME	0.116304	4.20187	Endophilin-A (SH3 domain-containing GRB2-like protein)	Frieseomelitta varia
A0A833RZB6	9HYME	0.382221	1.91974	Laminin subunit alpha	Frieseomelitta varia
A0A833S1K4	9HYME	0.0213387	2.58732	Malic enzyme	Frieseomelitta varia
A0A833S2V2	9HYME	0.370472	1.93296	Proteasome subunit alpha type	Frieseomelitta varia
A0A833S3B6	9HYME	0.298476	0.49437	RNA helicase (EC 3.6.4.13)	Frieseomelitta varia
A0A833S5I5	9HYME	0.000613366	3.17515	Phosphoglycerate kinase (EC 2.7.2.3)	Frieseomelitta varia
A0A833S6T1	9HYME	0.730464	0.854725	Carboxypeptidase B	Frieseomelitta varia
A0A833S6V3	9HYME	0.000569439	5.89885	Neurochondrin homolog	Frieseomelitta varia
A0A833S7R5	9HYME	0.140346	1.66614	Twitchin	Frieseomelitta varia
A0A833S8G1	9HYME	0.311985	1.58266	Aminopeptidase (EC 3.4.11.-)	Frieseomelitta varia
A0A833S8J0	9HYME	0.154097	1.93982	NTF2 domain-containing protein	Frieseomelitta varia
A0A833S8P7	9HYME	0.00936852	2.38925	ADF-H domain-containing protein	Frieseomelitta varia
A0A833SA96	9HYME	0.0986059	1.87679	Nucleoside diphosphate kinase (EC 2.7.4.6)	Frieseomelitta varia
A0A833SBP4	9HYME	0.316478	0.444645	Gal_mutarotas_2 domain-containing protein	Frieseomelitta varia
A0A833SBT7	9HYME	0.0581047	2.72258	Succinate--CoA ligase [ADP-forming] subunit beta, mitochondrial (EC 6.2.1.5) (Succinyl-CoA synthetase beta chain) (SCS-beta)	Frieseomelitta varia
A0A833SC01	9HYME	0.147869	1.71526	Glycerol-3-phosphate dehydrogenase (EC 1.1.5.3)	Frieseomelitta varia
A0A833SC55	9HYME	0.656429	1.21257	Rab GDP dissociation inhibitor	Frieseomelitta varia
A0A833SDV3	9HYME	0.0613304	10.7513	Paxillin	Frieseomelitta varia
A0A833SE01	9HYME	0.137248	0.646557	Translocon-associated protein subunit gamma (Signal sequence receptor subunit gamma)	Frieseomelitta varia
A0A833SEP6	9HYME	0.317253	1.4199	Transket_pyr domain-containing protein	Frieseomelitta varia
A0A833SGG6	9HYME	0.685625	1.26493	Adenosylhomocysteinase (EC 3.3.1.1)	Frieseomelitta varia
A0A833SK77	9HYME	0.30666	1.61716	Glycogen debranching enzyme (EC 2.4.1.25) (EC 3.2.1.33) (Glycogen debrancher)	Frieseomelitta varia
A0A833SMS6	9HYME	0.375081	1.76681	Malic enzyme	Frieseomelitta varia
A0A833SMW3	9HYME	0.457147	1.78741	Tubulin alpha chain	Frieseomelitta varia
A0A833VIQ1	9HYME	0.611554	0.921032	Calmodulin	Frieseomelitta varia
A0A833VMV6	9HYME	0.0165634	4.163	Eukaryotic translation initiation factor 5A (eIF-5A)	Frieseomelitta varia
A0A833VPL6	9HYME	0.468581	2.45571	EF-hand domain-containing protein	Frieseomelitta varia
A0A833VPP9	9HYME	0.22925	0.513634	ornithine aminotransferase (EC 2.6.1.13) (Ornithine--oxo-acid aminotransferase)	Frieseomelitta varia
A0A833VQ28	9HYME	0.0104169	6.47501	40S ribosomal protein S4	Frieseomelitta varia
A0A833VR32	9HYME	0.0221083	6.29281	EF-1-gamma C-terminal domain-containing protein	Frieseomelitta varia
A0A833VS22	9HYME	0.124557	3.088	Actin	Frieseomelitta varia
A0A833VV22	9HYME	0.014984	2.52179	WD_REPEATS_REGION domain-containing protein	Frieseomelitta varia
A0A833VVD0	9HYME	0.00761574	5.50871	Isocitrate dehydrogenase [NAD] subunit, mitochondrial	Frieseomelitta varia
A0A833VVP7	9HYME	0.187609	14.8533	Polyadenylate-binding protein (PABP)	Frieseomelitta varia
A0A833VWW5	9HYME	0.426578	1.61564	Catalase (EC 1.11.1.6)	Frieseomelitta varia
A0A833VXK1	9HYME	0.329213	0.590378	Myosin heavy chain, muscle	Frieseomelitta varia
A0A833VXN5	9HYME	0.102345	0.426637	Heat shock 70 kDa protein cognate 4	Frieseomelitta varia
A0A833W1X0	9HYME	0.0207909	0.297581	Alpha-galactosidase (EC 3.2.1.-)	Frieseomelitta varia
A0A833W2V6	9HYME	0.0786799	1.8526	Ras-related protein Rab-43	Frieseomelitta varia
A0A833W2V9	9HYME	0.0209766	2.17338	Fructose-bisphosphate aldolase (EC 4.1.2.13)	Frieseomelitta varia
A0A833W593	9HYME	0.698429	0.882633	Titin	Frieseomelitta varia
A0A833W6G6	9HYME	0.00165463	2.50145	Pyruvate kinase (EC 2.7.1.40)	Frieseomelitta varia
A0A833W6L4	9HYME	0.0409004	4.01664	Small nuclear ribonucleoprotein-associated protein	Frieseomelitta varia
A0A833W8Q7	9HYME	0.100543	4.07746	6-phosphogluconate dehydrogenase, decarboxylating (EC 1.1.1.44)	Frieseomelitta varia
A0A833W9A3	9HYME	0.490436	1.30963	Proteasome subunit alpha type	Frieseomelitta varia
A0A833W9E6	9HYME	0.0594558	1.74816	Dihydrolipoyl dehydrogenase (EC 1.8.1.4)	Frieseomelitta varia
A0A833WAD3	9HYME	0.12136	1.61124	Annexin	Frieseomelitta varia
A0A833WD27	9HYME	0.0490929	3.42803	Pyruvate dehydrogenase E1 component subunit beta (EC 1.2.4.1)	Frieseomelitta varia
A0A833WDK7	9HYME	0.0238005	2.00344	Calreticulin	Frieseomelitta varia
A0A833WDX6	9HYME	0.253358	1.44325	Heat shock protein 60	Frieseomelitta varia
A0A833WFE3	9HYME	0.221764	4.26631	Calcium-transporting ATPase (EC 7.2.2.10)	Frieseomelitta varia
A0A833WFT3	9HYME	0.0279409	1.97469	Thioredoxin domain-containing protein	Frieseomelitta varia
C0HLL3	VESVE	0.0892966	0.00883516	Phospholipase A1 (PLA1) (EC 3.1.1.32) (Vesp v 1)	Vespa velutina (Asian yellow-legged hornet)
C0HLL4	VESVE	0.032349	0.430259	Hyaluronidase A (EC 3.2.1.35) (Vesp v 2A)	Vespa velutina (Asian yellow-legged hornet)
C0HLL5	VESVE	0.570668	0.89977	Hyaluronidase B (EC 3.2.1.35) (Vesp v 2B)	Vespa velutina (Asian yellow-legged hornet)
C0IPU3	9HYME	0.00222738	16.5687	Phosphoenolpyruvate carboxykinase	Xylocopa caerulea
G9I553	MEGRT	0.0519584	2.91552	14-3-3 zeta	Megachile rotundata (Alfalfa leafcutting bee)
P0DMB8	VESVE	0.270415	0.396826	Phospholipase A1 verutoxin-2b (PLA1) (VT-2b) (EC 3.1.1.32) (EC 3.1.1.5)	Vespa velutina (Asian yellow-legged hornet)
P0DMB9	VESVE	0.00475153	0.0509939	Venom allergen 5 (Antigen 5) (allergen Vesp v 5)	Vespa velutina (Asian yellow-legged hornet)
Q17TA6	9HYME	0.0468135	1.84342	arginine kinase (EC 2.7.3.3)	Bombus festivus
Q1WHC2	DENAT	0.279682	2.07584	Histone H3	Dendrobates auratus (Green and black poison dart frog)
Q7YXM5	APILI	0.282927	1.4719	Superoxide dismutase (EC 1.15.1.1)	Apis mellifera ligustica (Common honeybee) (Italian honeybee)
Q7YXM6	APILI	0.619795	0.834939	Superoxide dismutase [Cu-Zn] (EC 1.15.1.1)	Apis mellifera ligustica (Common honeybee) (Italian honeybee)
Q86PH6	APIME	0.355037	1.37633	Transferrin	Apis mellifera (Honeybee)
Q8B3M2	9VIRU	0.869615	1.06499	Genome polyprotein	Deformed wing virus
R9QKY2	BOMHU	0.823557	0.917215	Glucose-6-phosphate isomerase (EC 5.3.1.9)	Bombus humilis (Brown-banded carder bee)
V9W8E0	9BACL	0.0469728	2.18048	Phage protein	Paenibacillus larvae subsp. larvae DSM 25430
