# Supplementary material for: Proteomics of Vespa velutina nigrithorax Venom Sac Queens and Workers: A Quantitative SWATH-MS Analysis
Source: Toxins (Basel). 2023 Apr 3;15(4):266. doi: 10.3390/toxins15040266 (PMC10144020; doi:10.3390/toxins15040266)
Supplement: Supplementary file 1 [file toxins-15-00266-s001.zip › Supplementary File S2.xlsx]

## Sheet: suplemental file S2
Uniprot	Protein names	Organism	PubMed ID	Gene Ontology (GO)	Pathway	Function [CC]	Gene Ontology (biological process)	Gene Ontology (cellular component)	Gene Ontology (molecular function)	Protein families
A0A2A3EH73	Titin	Apis cerana cerana (Oriental honeybee)
A0A2A3EHJ9	Tropomyosin	Apis cerana cerana (Oriental honeybee)								Tropomyosin family
A0A2A3E8T5	Actin	Apis cerana cerana (Oriental honeybee)								Actin family
A0A2A3EDC1	Tropomyosin-1	Apis cerana cerana (Oriental honeybee)								Tropomyosin family
A0A2A3E8D4	Myosin heavy chain, muscle	Apis cerana cerana (Oriental honeybee)		myosin complex [GO:0016459]; sarcomere [GO:0030017]; actin binding [GO:0003779]; ATP binding [GO:0005524]; cytoskeletal motor activity [GO:0003774]				myosin complex [GO:0016459]; sarcomere [GO:0030017]	actin binding [GO:0003779]; ATP binding [GO:0005524]; cytoskeletal motor activity [GO:0003774]	TRAFAC class myosin-kinesin ATPase superfamily, Myosin family
A0A2A3ESZ0	Apolipophorin	Apis cerana cerana (Oriental honeybee)		lipid transporter activity [GO:0005319]					lipid transporter activity [GO:0005319]
A0A2A3E7D0	Disorganized muscle protein	Apis cerana cerana (Oriental honeybee)
A0A2A3E250	Antitrypsin	Apis cerana cerana (Oriental honeybee)		extracellular space [GO:0005615]; serine-type endopeptidase inhibitor activity [GO:0004867]				extracellular space [GO:0005615]	serine-type endopeptidase inhibitor activity [GO:0004867]	Serpin family
A0A2A3E5F8	Transgelin	Apis cerana cerana (Oriental honeybee)		metal ion binding [GO:0046872]					metal ion binding [GO:0046872]	Calponin family
A0A2A3E6T3	Muscle LIM protein Mlp84B	Apis cerana cerana (Oriental honeybee)		metal ion binding [GO:0046872]					metal ion binding [GO:0046872]
A0A2A3E292	Glutathione S-transferase	Apis cerana cerana (Oriental honeybee)		transferase activity [GO:0016740]					transferase activity [GO:0016740]
A0A2A3EJU2	Retinal dehydrogenase	Apis cerana cerana (Oriental honeybee)		oxidoreductase activity, acting on the aldehyde or oxo group of donors, NAD or NADP as acceptor [GO:0016620]					oxidoreductase activity, acting on the aldehyde or oxo group of donors, NAD or NADP as acceptor [GO:0016620]	Aldehyde dehydrogenase family
A0A2A3E889	Hexamerin	Apis cerana cerana (Oriental honeybee)
A0A2A3EA22	Four and a half LIM domains protein	Apis cerana cerana (Oriental honeybee)		metal ion binding [GO:0046872]					metal ion binding [GO:0046872]
A0A2A3EHE9	ANK_REP_REGION domain-containing protein	Apis cerana cerana (Oriental honeybee)
A0A2A3EL86	Elongation factor 1-gamma	Apis cerana cerana (Oriental honeybee)		translation elongation factor activity [GO:0003746]		FUNCTION: Probably plays a role in anchoring the complex to other cellular components. {ECO:0000256|ARBA:ARBA00003468}.			translation elongation factor activity [GO:0003746]
A0A2A3E464	ATP synthase subunit alpha	Apis cerana cerana (Oriental honeybee)		proton-transporting ATP synthase complex, catalytic core F(1) [GO:0045261]; ATP binding [GO:0005524]; proton-transporting ATP synthase activity, rotational mechanism [GO:0046933]		FUNCTION: Produces ATP from ADP in the presence of a proton gradient across the membrane. {ECO:0000256|RuleBase:RU003551}.		proton-transporting ATP synthase complex, catalytic core F(1) [GO:0045261]	ATP binding [GO:0005524]; proton-transporting ATP synthase activity, rotational mechanism [GO:0046933]	ATPase alpha/beta chains family
A0A1B1JID1	Superoxide dismutase [Cu-Zn] (EC 1.15.1.1)	Apis mellifera (Honeybee)		metal ion binding [GO:0046872]; superoxide dismutase activity [GO:0004784]		FUNCTION: Destroys radicals which are normally produced within the cells and which are toxic to biological systems. {ECO:0000256|RuleBase:RU000393}.			metal ion binding [GO:0046872]; superoxide dismutase activity [GO:0004784]	Cu-Zn superoxide dismutase family
Q7YXM6	Superoxide dismutase [Cu-Zn] (EC 1.15.1.1)	Apis mellifera ligustica (Common honeybee) (Italian honeybee)	11932240; 16139867	metal ion binding [GO:0046872]; superoxide dismutase activity [GO:0004784]		FUNCTION: Destroys radicals which are normally produced within the cells and which are toxic to biological systems. {ECO:0000256|RuleBase:RU000393}.			metal ion binding [GO:0046872]; superoxide dismutase activity [GO:0004784]	Cu-Zn superoxide dismutase family
Q7YXM5	Superoxide dismutase (EC 1.15.1.1)	Apis mellifera ligustica (Common honeybee) (Italian honeybee)	11932240; 16139867	metal ion binding [GO:0046872]; superoxide dismutase activity [GO:0004784]		FUNCTION: Destroys radicals which are normally produced within the cells and which are toxic to biological systems. {ECO:0000256|RuleBase:RU000414}.; FUNCTION: Destroys superoxide anion radicals which are normally produced within the cells and which are toxic to biological systems. {ECO:0000256|ARBA:ARBA00002170}.			metal ion binding [GO:0046872]; superoxide dismutase activity [GO:0004784]	Iron/manganese superoxide dismutase family
A0A6B2F305	Thioredoxin domain-containing protein	Bothriechis nigroviridis (Black-speckled palm pit viper)		peroxiredoxin activity [GO:0051920]		FUNCTION: Thiol-specific peroxidase that catalyzes the reduction of hydrogen peroxide and organic hydroperoxides to water and alcohols, respectively. {ECO:0000256|PIRNR:PIRNR000239}.			peroxiredoxin activity [GO:0051920]	Peroxiredoxin family
A0A484GDQ5	Elongation factor Tu (EF-Tu)	Candidatus Schmidhempelia bombi str. Bimp	24747890	cytoplasm [GO:0005737]; GTP binding [GO:0005525]; GTPase activity [GO:0003924]; guanosine tetraphosphate binding [GO:0097216]; translation elongation factor activity [GO:0003746]		FUNCTION: This protein promotes the GTP-dependent binding of aminoacyl-tRNA to the A-site of ribosomes during protein biosynthesis. {ECO:0000256|HAMAP-Rule:MF_00118}.		cytoplasm [GO:0005737]	GTP binding [GO:0005525]; GTPase activity [GO:0003924]; guanosine tetraphosphate binding [GO:0097216]; translation elongation factor activity [GO:0003746]	TRAFAC class translation factor GTPase superfamily, Classic translation factor GTPase family, EF-Tu/EF-1A subfamily
Q1WHC2	Histone H3	Dendrobates auratus (Green and black poison dart frog)		nucleosome [GO:0000786]; nucleus [GO:0005634]; DNA binding [GO:0003677]; protein heterodimerization activity [GO:0046982]; structural constituent of chromatin [GO:0030527]				nucleosome [GO:0000786]; nucleus [GO:0005634]	DNA binding [GO:0003677]; protein heterodimerization activity [GO:0046982]; structural constituent of chromatin [GO:0030527]	Histone H3 family
A0A154PJZ1	Paramyosin, long form	Dufourea novaeangliae (Sweat bee)		myosin complex [GO:0016459]				myosin complex [GO:0016459]
A0A154P4T7	Four and a half LIM domains protein 2	Dufourea novaeangliae (Sweat bee)		metal ion binding [GO:0046872]					metal ion binding [GO:0046872]
A0A154NYM3	Transgelin	Dufourea novaeangliae (Sweat bee)		metal ion binding [GO:0046872]					metal ion binding [GO:0046872]	Calponin family
A0A154P3Q8	Elongation factor 2	Dufourea novaeangliae (Sweat bee)		GTP binding [GO:0005525]; GTPase activity [GO:0003924]; translation elongation factor activity [GO:0003746]					GTP binding [GO:0005525]; GTPase activity [GO:0003924]; translation elongation factor activity [GO:0003746]	TRAFAC class translation factor GTPase superfamily, Classic translation factor GTPase family, EF-G/EF-2 subfamily
A0A154NXS4	Troponin I	Dufourea novaeangliae (Sweat bee)		troponin complex [GO:0005861]				troponin complex [GO:0005861]
A0A154PSQ8	Myosin heavy chain, muscle	Dufourea novaeangliae (Sweat bee)		myosin complex [GO:0016459]; sarcomere [GO:0030017]; actin filament binding [GO:0051015]; ATP binding [GO:0005524]; cytoskeletal motor activity [GO:0003774]				myosin complex [GO:0016459]; sarcomere [GO:0030017]	actin filament binding [GO:0051015]; ATP binding [GO:0005524]; cytoskeletal motor activity [GO:0003774]	TRAFAC class myosin-kinesin ATPase superfamily, Myosin family
A0A154PQA1	Myofilin	Dufourea novaeangliae (Sweat bee)
A0A154PLJ1	Heat shock 70 kDa protein cognate 5	Dufourea novaeangliae (Sweat bee)		ATP binding [GO:0005524]; ATP-dependent protein folding chaperone [GO:0140662]; unfolded protein binding [GO:0051082]					ATP binding [GO:0005524]; ATP-dependent protein folding chaperone [GO:0140662]; unfolded protein binding [GO:0051082]	Heat shock protein 70 family
A0A154PBQ9	Putative enoyl-CoA hydratase, mitochondrial	Dufourea novaeangliae (Sweat bee)		catalytic activity [GO:0003824]					catalytic activity [GO:0003824]
A0A154PJJ4	Annexin	Dufourea novaeangliae (Sweat bee)		calcium ion binding [GO:0005509]; calcium-dependent phospholipid binding [GO:0005544]					calcium ion binding [GO:0005509]; calcium-dependent phospholipid binding [GO:0005544]	Annexin family
A0A154PKU8	Malic enzyme	Dufourea novaeangliae (Sweat bee)		malate dehydrogenase (decarboxylating) (NAD+) activity [GO:0004471]; metal ion binding [GO:0046872]; NAD binding [GO:0051287]					malate dehydrogenase (decarboxylating) (NAD+) activity [GO:0004471]; metal ion binding [GO:0046872]; NAD binding [GO:0051287]	Malic enzymes family
A0A154P559	Glucose dehydrogenase [acceptor]	Dufourea novaeangliae (Sweat bee)		flavin adenine dinucleotide binding [GO:0050660]; oxidoreductase activity, acting on CH-OH group of donors [GO:0016614]					flavin adenine dinucleotide binding [GO:0050660]; oxidoreductase activity, acting on CH-OH group of donors [GO:0016614]	GMC oxidoreductase family
A0A154PQS0	H(+)-transporting two-sector ATPase (EC 7.1.2.2)	Dufourea novaeangliae (Sweat bee)		proton-transporting V-type ATPase, V1 domain [GO:0033180]; ATP binding [GO:0005524]; proton-transporting ATP synthase activity, rotational mechanism [GO:0046933]; proton-transporting ATPase activity, rotational mechanism [GO:0046961]		FUNCTION: Catalytic subunit of the V1 complex of vacuolar(H+)-ATPase (V-ATPase), a multisubunit enzyme composed of a peripheral complex (V1) that hydrolyzes ATP and a membrane integral complex (V0) that translocates protons (By similarity). V-ATPase is responsible for acidifying and maintaining the pH of intracellular compartments and in some cell types, is targeted to the plasma membrane, where …		proton-transporting V-type ATPase, V1 domain [GO:0033180]	ATP binding [GO:0005524]; proton-transporting ATP synthase activity, rotational mechanism [GO:0046933]; proton-transporting ATPase activity, rotational mechanism [GO:0046961]	ATPase alpha/beta chains family
A0A154P1L6	ATP synthase subunit beta (EC 7.1.2.2)	Dufourea novaeangliae (Sweat bee)		proton-transporting ATP synthase complex, catalytic core F(1) [GO:0045261]; ATP binding [GO:0005524]; proton-transporting ATP synthase activity, rotational mechanism [GO:0046933]; proton-transporting ATPase activity, rotational mechanism [GO:0046961]		FUNCTION: Produces ATP from ADP in the presence of a proton gradient across the membrane. {ECO:0000256|RuleBase:RU003553}.		proton-transporting ATP synthase complex, catalytic core F(1) [GO:0045261]	ATP binding [GO:0005524]; proton-transporting ATP synthase activity, rotational mechanism [GO:0046933]; proton-transporting ATPase activity, rotational mechanism [GO:0046961]	ATPase alpha/beta chains family
A0A154PHR8	Coronin	Dufourea novaeangliae (Sweat bee)		cytoplasm [GO:0005737]; cytoskeleton [GO:0005856]		FUNCTION: Regulates leading edge dynamics and cell motility in fibroblasts. May be involved in cytokinesis and signal transduction. {ECO:0000256|ARBA:ARBA00024891}.		cytoplasm [GO:0005737]; cytoskeleton [GO:0005856]		WD repeat coronin family
A0A154P1Q6	Elongation factor 1-alpha	Dufourea novaeangliae (Sweat bee)		cytoplasm [GO:0005737]; GTP binding [GO:0005525]; GTPase activity [GO:0003924]; translation elongation factor activity [GO:0003746]		FUNCTION: This protein promotes the GTP-dependent binding of aminoacyl-tRNA to the A-site of ribosomes during protein biosynthesis. {ECO:0000256|ARBA:ARBA00003982, ECO:0000256|RuleBase:RU000325}.		cytoplasm [GO:0005737]	GTP binding [GO:0005525]; GTPase activity [GO:0003924]; translation elongation factor activity [GO:0003746]	TRAFAC class translation factor GTPase superfamily, Classic translation factor GTPase family, EF-Tu/EF-1A subfamily
A0A833VXK1	Myosin heavy chain, muscle	Frieseomelitta varia		myosin complex [GO:0016459]; sarcomere [GO:0030017]; actin filament binding [GO:0051015]; ATP binding [GO:0005524]; cytoskeletal motor activity [GO:0003774]				myosin complex [GO:0016459]; sarcomere [GO:0030017]	actin filament binding [GO:0051015]; ATP binding [GO:0005524]; cytoskeletal motor activity [GO:0003774]	TRAFAC class myosin-kinesin ATPase superfamily, Myosin family
A0A833RUN1	Heat shock 70 kDa protein cognate 4	Frieseomelitta varia		ATP binding [GO:0005524]; ATP-dependent protein folding chaperone [GO:0140662]					ATP binding [GO:0005524]; ATP-dependent protein folding chaperone [GO:0140662]	Heat shock protein 70 family
A0A833SEP6	Transket_pyr domain-containing protein	Frieseomelitta varia		metal ion binding [GO:0046872]; transferase activity [GO:0016740]					metal ion binding [GO:0046872]; transferase activity [GO:0016740]
A0A833S1K4	Malic enzyme	Frieseomelitta varia		malate dehydrogenase (decarboxylating) (NAD+) activity [GO:0004471]; metal ion binding [GO:0046872]; NAD binding [GO:0051287]					malate dehydrogenase (decarboxylating) (NAD+) activity [GO:0004471]; metal ion binding [GO:0046872]; NAD binding [GO:0051287]	Malic enzymes family
A0A833VV22	WD_REPEATS_REGION domain-containing protein	Frieseomelitta varia
A0A833RVQ9	Aldo_ket_red domain-containing protein	Frieseomelitta varia		oxidoreductase activity [GO:0016491]					oxidoreductase activity [GO:0016491]
A0A833VXN5	Heat shock 70 kDa protein cognate 4	Frieseomelitta varia		ATP binding [GO:0005524]; ATP-dependent protein folding chaperone [GO:0140662]					ATP binding [GO:0005524]; ATP-dependent protein folding chaperone [GO:0140662]	Heat shock protein 70 family
A0A833RNR7	Paramyosin	Frieseomelitta varia		myosin complex [GO:0016459]				myosin complex [GO:0016459]
A0A833RSE1	Heat shock protein 83	Frieseomelitta varia		ATP binding [GO:0005524]; ATP hydrolysis activity [GO:0016887]; ATP-dependent protein folding chaperone [GO:0140662]; unfolded protein binding [GO:0051082]					ATP binding [GO:0005524]; ATP hydrolysis activity [GO:0016887]; ATP-dependent protein folding chaperone [GO:0140662]; unfolded protein binding [GO:0051082]	Heat shock protein 90 family
A0A833RPK8	Heterogeneous nuclear ribonucleoprotein R	Frieseomelitta varia		RNA binding [GO:0003723]					RNA binding [GO:0003723]
A0A833RNQ9	Microtubule-associated protein 2	Frieseomelitta varia
A0A833R5H5	DJ-1_PfpI domain-containing protein	Frieseomelitta varia
A0A833WAD3	Annexin	Frieseomelitta varia		calcium ion binding [GO:0005509]; calcium-dependent phospholipid binding [GO:0005544]					calcium ion binding [GO:0005509]; calcium-dependent phospholipid binding [GO:0005544]	Annexin family
A0A833S3B6	RNA helicase (EC 3.6.4.13)	Frieseomelitta varia		intracellular organelle [GO:0043229]; ATP binding [GO:0005524]; hydrolase activity [GO:0016787]; RNA helicase activity [GO:0003724]; translation initiation factor activity [GO:0003743]				intracellular organelle [GO:0043229]	ATP binding [GO:0005524]; hydrolase activity [GO:0016787]; RNA helicase activity [GO:0003724]; translation initiation factor activity [GO:0003743]	DEAD box helicase family, eIF4A subfamily
A0A833RFX8	Apolipophorin	Frieseomelitta varia		lipid transporter activity [GO:0005319]					lipid transporter activity [GO:0005319]
A0A833VS22	Actin	Frieseomelitta varia								Actin family
A0A833RMB6	Muscle LIM protein Mlp84B	Frieseomelitta varia		metal ion binding [GO:0046872]					metal ion binding [GO:0046872]
A0A833S6V3	Neurochondrin homolog	Frieseomelitta varia								Neurochondrin family
A0A833W2V6	Ras-related protein Rab-43	Frieseomelitta varia		mitochondrial matrix [GO:0005759]; GTP binding [GO:0005525]; GTPase activity [GO:0003924]				mitochondrial matrix [GO:0005759]	GTP binding [GO:0005525]; GTPase activity [GO:0003924]	MAM33 family
A0A833RNQ4	N-sulfoglucosamine sulfohydrolase	Frieseomelitta varia		sulfuric ester hydrolase activity [GO:0008484]					sulfuric ester hydrolase activity [GO:0008484]	Sulfatase family
A0A833RRS5	Glutathione S-transferase 1-like	Frieseomelitta varia
A0A833SMS6	Malic enzyme	Frieseomelitta varia		malate dehydrogenase (decarboxylating) (NAD+) activity [GO:0004471]; metal ion binding [GO:0046872]; NAD binding [GO:0051287]					malate dehydrogenase (decarboxylating) (NAD+) activity [GO:0004471]; metal ion binding [GO:0046872]; NAD binding [GO:0051287]	Malic enzymes family
A0A833RND1	Myosin light chain alkali	Frieseomelitta varia		calcium ion binding [GO:0005509]					calcium ion binding [GO:0005509]
A0A833RY46	Lamin-C	Frieseomelitta varia		intermediate filament [GO:0005882]				intermediate filament [GO:0005882]		Intermediate filament family
A0A833RXQ9	NADH dehydrogenase [ubiquinone] flavoprotein 2, mitochondrial	Frieseomelitta varia		2 iron, 2 sulfur cluster binding [GO:0051537]; metal ion binding [GO:0046872]; oxidoreductase activity [GO:0016491]					2 iron, 2 sulfur cluster binding [GO:0051537]; metal ion binding [GO:0046872]; oxidoreductase activity [GO:0016491]	Complex I 24 kDa subunit family
A0A833R5C8	Lipocln_cytosolic_FA-bd_dom domain-containing protein	Frieseomelitta varia		lipid binding [GO:0008289]					lipid binding [GO:0008289]	Calycin superfamily, Fatty-acid binding protein (FABP) family
A0A833VR32	EF-1-gamma C-terminal domain-containing protein	Frieseomelitta varia		translation elongation factor activity [GO:0003746]					translation elongation factor activity [GO:0003746]
A0A833VVP7	Polyadenylate-binding protein (PABP)	Frieseomelitta varia		cytoplasm [GO:0005737]; RNA binding [GO:0003723]		FUNCTION: Binds the poly(A) tail of mRNA. {ECO:0000256|RuleBase:RU362004}.		cytoplasm [GO:0005737]	RNA binding [GO:0003723]	Polyadenylate-binding protein type-1 family
A0A833WFE3	Calcium-transporting ATPase (EC 7.2.2.10)	Frieseomelitta varia		sarcoplasmic reticulum membrane [GO:0033017]; ATP binding [GO:0005524]; ATP hydrolysis activity [GO:0016887]; P-type calcium transporter activity [GO:0005388]		FUNCTION: Catalyzes the hydrolysis of ATP coupled with the transport of calcium. {ECO:0000256|RuleBase:RU361146}.		sarcoplasmic reticulum membrane [GO:0033017]	ATP binding [GO:0005524]; ATP hydrolysis activity [GO:0016887]; P-type calcium transporter activity [GO:0005388]	Cation transport ATPase (P-type) (TC 3.A.3) family
A0A833R489	Superoxide dismutase (EC 1.15.1.1)	Frieseomelitta varia		metal ion binding [GO:0046872]; superoxide dismutase activity [GO:0004784]		FUNCTION: Destroys radicals which are normally produced within the cells and which are toxic to biological systems. {ECO:0000256|RuleBase:RU000414}.; FUNCTION: Destroys superoxide anion radicals which are normally produced within the cells and which are toxic to biological systems. {ECO:0000256|ARBA:ARBA00002170}.			metal ion binding [GO:0046872]; superoxide dismutase activity [GO:0004784]	Iron/manganese superoxide dismutase family
A0A833RYJ0	Endophilin-A (SH3 domain-containing GRB2-like protein)	Frieseomelitta varia		cytoplasm [GO:0005737]; intracellular organelle [GO:0043229]		FUNCTION: Required presynaptically at the neuromuscular junction. Implicated in synaptic vesicle endocytosis. {ECO:0000256|ARBA:ARBA00003037}.		cytoplasm [GO:0005737]; intracellular organelle [GO:0043229]
A0A833RCZ1	Thioredoxin domain-containing protein	Frieseomelitta varia		peroxiredoxin activity [GO:0051920]		FUNCTION: Thiol-specific peroxidase that catalyzes the reduction of hydrogen peroxide and organic hydroperoxides to water and alcohols, respectively. {ECO:0000256|PIRNR:PIRNR000239}.			peroxiredoxin activity [GO:0051920]	Peroxiredoxin family
A0A833WFT3	Thioredoxin domain-containing protein	Frieseomelitta varia		peroxiredoxin activity [GO:0051920]		FUNCTION: Thiol-specific peroxidase that catalyzes the reduction of hydrogen peroxide and organic hydroperoxides to water and alcohols, respectively. {ECO:0000256|PIRNR:PIRNR000239}.			peroxiredoxin activity [GO:0051920]	Peroxiredoxin family, Prx6 subfamily
A0A2V4DR27	2,5-diketo-D-gluconic acid reductase	Gilliamella apis		oxidoreductase activity [GO:0016491]					oxidoreductase activity [GO:0016491]
A0A3R6WCH9	DNA primase (EC 2.7.7.101)	Lactobacillus bombicola		DNA-directed RNA polymerase complex [GO:0000428]; primosome complex [GO:1990077]; DNA binding [GO:0003677]; DNA primase activity [GO:0003896]; zinc ion binding [GO:0008270]		FUNCTION: RNA polymerase that catalyzes the synthesis of short RNA molecules used as primers for DNA polymerase during DNA replication. {ECO:0000256|HAMAP-Rule:MF_00974, ECO:0000256|PIRNR:PIRNR002811}.		DNA-directed RNA polymerase complex [GO:0000428]; primosome complex [GO:1990077]	DNA binding [GO:0003677]; DNA primase activity [GO:0003896]; zinc ion binding [GO:0008270]	DnaG primase family
G9I553	14-3-3 zeta	Megachile rotundata (Alfalfa leafcutting bee)								14-3-3 family
V9W8E0	Phage protein	Paenibacillus larvae subsp. larvae DSM 25430	24599066
A0A0L0BDD6	Lipoprotein	Pseudomonas sp. RIT-PI-a
A0A821LMA2	(mimic poison frog) hypothetical protein	Ranitomeya imitator (mimic poison frog)		extracellular space [GO:0005615]				extracellular space [GO:0005615]
A0A821Q3K0	(mimic poison frog) hypothetical protein	Ranitomeya imitator (mimic poison frog)		oxidoreductase activity, acting on the aldehyde or oxo group of donors, NAD or NADP as acceptor [GO:0016620]					oxidoreductase activity, acting on the aldehyde or oxo group of donors, NAD or NADP as acceptor [GO:0016620]	Glyceraldehyde-3-phosphate dehydrogenase family
A0A821YJ38	(mimic poison frog) hypothetical protein	Ranitomeya imitator (mimic poison frog)		keratin filament [GO:0045095]				keratin filament [GO:0045095]		Intermediate filament family
A0A822I5U0	(mimic poison frog) hypothetical protein	Ranitomeya imitator (mimic poison frog)		ATP binding [GO:0005524]; ATP-dependent protein folding chaperone [GO:0140662]					ATP binding [GO:0005524]; ATP-dependent protein folding chaperone [GO:0140662]	Heat shock protein 70 family
A0A822I9M5	(mimic poison frog) hypothetical protein	Ranitomeya imitator (mimic poison frog)		oxidoreductase activity [GO:0016491]					oxidoreductase activity [GO:0016491]	Aldo/keto reductase family
A0A822FI73	(mimic poison frog) hypothetical protein	Ranitomeya imitator (mimic poison frog)		hemoglobin complex [GO:0005833]; heme binding [GO:0020037]; metal ion binding [GO:0046872]; oxygen binding [GO:0019825]; oxygen carrier activity [GO:0005344]				hemoglobin complex [GO:0005833]	heme binding [GO:0020037]; metal ion binding [GO:0046872]; oxygen binding [GO:0019825]; oxygen carrier activity [GO:0005344]	Globin family
A0A822C0E9	T-complex protein 1 subunit beta (CCT-beta)	Ranitomeya imitator (mimic poison frog)		chaperonin-containing T-complex [GO:0005832]; ATP binding [GO:0005524]; ATP hydrolysis activity [GO:0016887]; ATP-dependent protein folding chaperone [GO:0140662]; unfolded protein binding [GO:0051082]				chaperonin-containing T-complex [GO:0005832]	ATP binding [GO:0005524]; ATP hydrolysis activity [GO:0016887]; ATP-dependent protein folding chaperone [GO:0140662]; unfolded protein binding [GO:0051082]	TCP-1 chaperonin family
A0A821TH16	Prohibitin	Ranitomeya imitator (mimic poison frog)		mitochondrial inner membrane [GO:0005743]; plasma membrane [GO:0005886]				mitochondrial inner membrane [GO:0005743]; plasma membrane [GO:0005886]		Prohibitin family
A0A1V9X4H1	vesicle-fusing ATPase (EC 3.6.4.6)	Tropilaelaps mercedesae	28327890	ATP binding [GO:0005524]; ATP hydrolysis activity [GO:0016887]					ATP binding [GO:0005524]; ATP hydrolysis activity [GO:0016887]
A0A1V9XK33	14-3-3 protein zeta-like	Tropilaelaps mercedesae	28327890							14-3-3 family
A0A1V9XXZ1	Histone H4	Tropilaelaps mercedesae	28327890	nucleosome [GO:0000786]; nucleus [GO:0005634]; DNA binding [GO:0003677]; protein heterodimerization activity [GO:0046982]; structural constituent of chromatin [GO:0030527]		FUNCTION: Core component of nucleosome. Nucleosomes wrap and compact DNA into chromatin, limiting DNA accessibility to the cellular machineries which require DNA as a template. Histones thereby play a central role in transcription regulation, DNA repair, DNA replication and chromosomal stability. DNA accessibility is regulated via a complex set of post-translational modifications of histones, als…		nucleosome [GO:0000786]; nucleus [GO:0005634]	DNA binding [GO:0003677]; protein heterodimerization activity [GO:0046982]; structural constituent of chromatin [GO:0030527]	Histone H2B family; Histone H4 family
P0DMB9	Venom allergen 5 (Antigen 5) (allergen Vesp v 5)	Vespa velutina (Asian yellow-legged hornet)	25896434; 10484737; 31923175	extracellular region [GO:0005576]		FUNCTION: Does not show toxicity when intravenously injected into mice tail. {ECO:0000269|PubMed:10484737}.		extracellular region [GO:0005576]		CRISP family
A0A833W6G6	Pyruvate kinase (EC 2.7.1.40)	Frieseomelitta varia		ATP binding [GO:0005524]; kinase activity [GO:0016301]; magnesium ion binding [GO:0000287]; potassium ion binding [GO:0030955]; pyruvate kinase activity [GO:0004743]	PATHWAY: Carbohydrate degradation; glycolysis; pyruvate from D-glyceraldehyde 3-phosphate: step 5/5. {ECO:0000256|ARBA:ARBA00004997, ECO:0000256|RuleBase:RU000504}.				ATP binding [GO:0005524]; kinase activity [GO:0016301]; magnesium ion binding [GO:0000287]; potassium ion binding [GO:0030955]; pyruvate kinase activity [GO:0004743]	Pyruvate kinase family
A0A154P296	Acetyl-CoA hydrolase (EC 3.1.2.1) (Acetyl-CoA deacylase)	Dufourea novaeangliae (Sweat bee)		acetate CoA-transferase activity [GO:0008775]; acetyl-CoA hydrolase activity [GO:0003986]; acetate metabolic process [GO:0006083]			acetate metabolic process [GO:0006083]		acetate CoA-transferase activity [GO:0008775]; acetyl-CoA hydrolase activity [GO:0003986]	Acetyl-CoA hydrolase/transferase family
A0A2A3E2W8	Pyruvate dehydrogenase E1 component subunit alpha (EC 1.2.4.1)	Apis cerana cerana (Oriental honeybee)		intracellular membrane-bounded organelle [GO:0043231]; pyruvate dehydrogenase (acetyl-transferring) activity [GO:0004739]; acetyl-CoA biosynthetic process from pyruvate [GO:0006086]		FUNCTION: The pyruvate dehydrogenase complex catalyzes the overall conversion of pyruvate to acetyl-CoA and CO(2). {ECO:0000256|RuleBase:RU361139}.	acetyl-CoA biosynthetic process from pyruvate [GO:0006086]	intracellular membrane-bounded organelle [GO:0043231]	pyruvate dehydrogenase (acetyl-transferring) activity [GO:0004739]
A0A833WD27	Pyruvate dehydrogenase E1 component subunit beta (EC 1.2.4.1)	Frieseomelitta varia		pyruvate dehydrogenase (acetyl-transferring) activity [GO:0004739]; acetyl-CoA biosynthetic process from pyruvate [GO:0006086]		FUNCTION: The pyruvate dehydrogenase complex catalyzes the overall conversion of pyruvate to acetyl-CoA and CO2. {ECO:0000256|RuleBase:RU364074}.	acetyl-CoA biosynthetic process from pyruvate [GO:0006086]		pyruvate dehydrogenase (acetyl-transferring) activity [GO:0004739]
A0A2A3ELF2	Dihydrolipoyllysine-residue acetyltransferase component of pyruvate dehydrogenase complex	Apis cerana cerana (Oriental honeybee)		extracellular region [GO:0005576]; pyruvate dehydrogenase complex [GO:0045254]; acyltransferase activity [GO:0016746]; chitin binding [GO:0008061]; chitinase activity [GO:0004568]; acetyl-CoA biosynthetic process from pyruvate [GO:0006086]; carbohydrate metabolic process [GO:0005975]; chitin catabolic process [GO:0006032]			acetyl-CoA biosynthetic process from pyruvate [GO:0006086]; carbohydrate metabolic process [GO:0005975]; chitin catabolic process [GO:0006032]	extracellular region [GO:0005576]; pyruvate dehydrogenase complex [GO:0045254]	acyltransferase activity [GO:0016746]; chitin binding [GO:0008061]; chitinase activity [GO:0004568]	2-oxoacid dehydrogenase family; Glycosyl hydrolase 18 family, Chitinase class II subfamily
A0A2A3EF66	Filamin-B	Apis cerana cerana (Oriental honeybee)		intracellular non-membrane-bounded organelle [GO:0043232]; actin filament binding [GO:0051015]; actin cytoskeleton organization [GO:0030036]			actin cytoskeleton organization [GO:0030036]	intracellular non-membrane-bounded organelle [GO:0043232]	actin filament binding [GO:0051015]	Filamin family
A0A154PJR5	Filamin-A	Dufourea novaeangliae (Sweat bee)		actin filament binding [GO:0051015]; actin cytoskeleton organization [GO:0030036]			actin cytoskeleton organization [GO:0030036]		actin filament binding [GO:0051015]	Filamin family
A0A833RMX9	Filamin-A	Frieseomelitta varia		intracellular non-membrane-bounded organelle [GO:0043232]; actin filament binding [GO:0051015]; actin cytoskeleton organization [GO:0030036]			actin cytoskeleton organization [GO:0030036]	intracellular non-membrane-bounded organelle [GO:0043232]	actin filament binding [GO:0051015]	Filamin family
A0A1V9Y337	Filamin-C-like	Tropilaelaps mercedesae	28327890	actin filament binding [GO:0051015]; actin cytoskeleton organization [GO:0030036]			actin cytoskeleton organization [GO:0030036]		actin filament binding [GO:0051015]	Filamin family
A0A154P796	Spectrin alpha chain	Dufourea novaeangliae (Sweat bee)		cytoplasm [GO:0005737]; cytoskeleton [GO:0005856]; actin binding [GO:0003779]; calcium ion binding [GO:0005509]; calmodulin binding [GO:0005516]; actin filament capping [GO:0051693]			actin filament capping [GO:0051693]	cytoplasm [GO:0005737]; cytoskeleton [GO:0005856]	actin binding [GO:0003779]; calcium ion binding [GO:0005509]; calmodulin binding [GO:0005516]	Spectrin family
A0A154PNQ0	Sortilin-related receptor (Low-density lipoprotein receptor relative with 11 ligand-binding repeats) (Sorting protein-related receptor containing LDLR class A repeats)	Dufourea novaeangliae (Sweat bee)		early endosome membrane [GO:0031901]; endoplasmic reticulum membrane [GO:0005789]; extracellular region [GO:0005576]; Golgi membrane [GO:0000139]; multivesicular body membrane [GO:0032585]; plasma membrane [GO:0005886]; recycling endosome membrane [GO:0055038]; transport vesicle membrane [GO:0030658]; actin binding [GO:0003779]; actin filament capping [GO:0051693]; endocytosis [GO:0006897]			actin filament capping [GO:0051693]; endocytosis [GO:0006897]	early endosome membrane [GO:0031901]; endoplasmic reticulum membrane [GO:0005789]; extracellular region [GO:0005576]; Golgi membrane [GO:0000139]; multivesicular body membrane [GO:0032585]; plasma membrane [GO:0005886]; recycling endosome membrane [GO:0055038]; transport vesicle membrane [GO:0030658]	actin binding [GO:0003779]	VPS10-related sortilin family, SORL1 subfamily; Spectrin family
A0A833S8P7	ADF-H domain-containing protein	Frieseomelitta varia		actin cytoskeleton [GO:0015629]; actin binding [GO:0003779]; actin filament depolymerization [GO:0030042]; regulation of cellular component biogenesis [GO:0044087]; regulation of cellular component organization [GO:0051128]			actin filament depolymerization [GO:0030042]; regulation of cellular component biogenesis [GO:0044087]; regulation of cellular component organization [GO:0051128]	actin cytoskeleton [GO:0015629]	actin binding [GO:0003779]	Actin-binding proteins ADF family
A0A6B2F472	alcohol dehydrogenase (NADP(+)) (EC 1.1.1.2)	Bothriechis nigroviridis (Black-speckled palm pit viper)		apical plasma membrane [GO:0016324]; cytosol [GO:0005829]; alcohol dehydrogenase (NADP+) activity [GO:0008106]; aldehyde catabolic process [GO:0046185]			aldehyde catabolic process [GO:0046185]	apical plasma membrane [GO:0016324]; cytosol [GO:0005829]	alcohol dehydrogenase (NADP+) activity [GO:0008106]	Aldo/keto reductase family
A0A2A3EPX9	glutamate dehydrogenase [NAD(P)(+)] (EC 1.4.1.3)	Apis cerana cerana (Oriental honeybee)		glutamate dehydrogenase [NAD(P)+] activity [GO:0004353]; amino acid metabolic process [GO:0006520]			amino acid metabolic process [GO:0006520]		glutamate dehydrogenase [NAD(P)+] activity [GO:0004353]	Glu/Leu/Phe/Val dehydrogenases family
A0A154PJP5	Titin	Dufourea novaeangliae (Sweat bee)		anatomical structure morphogenesis [GO:0009653]; cell differentiation [GO:0030154]			anatomical structure morphogenesis [GO:0009653]; cell differentiation [GO:0030154]			Protein kinase superfamily, CAMK Ser/Thr protein kinase family
A0A2A3E811	Titin	Apis cerana cerana (Oriental honeybee)		ATP binding [GO:0005524]; protein kinase activity [GO:0004672]; anatomical structure morphogenesis [GO:0009653]; cell differentiation [GO:0030154]; protein phosphorylation [GO:0006468]			anatomical structure morphogenesis [GO:0009653]; cell differentiation [GO:0030154]; protein phosphorylation [GO:0006468]		ATP binding [GO:0005524]; protein kinase activity [GO:0004672]	Protein kinase superfamily, CAMK Ser/Thr protein kinase family
A0A154PIM3	Twitchin	Dufourea novaeangliae (Sweat bee)		ATP binding [GO:0005524]; protein kinase activity [GO:0004672]; anatomical structure morphogenesis [GO:0009653]; cell differentiation [GO:0030154]; protein phosphorylation [GO:0006468]			anatomical structure morphogenesis [GO:0009653]; cell differentiation [GO:0030154]; protein phosphorylation [GO:0006468]		ATP binding [GO:0005524]; protein kinase activity [GO:0004672]	Protein kinase superfamily, CAMK Ser/Thr protein kinase family
A0A154P3S2	Muscle M-line assembly protein unc-89	Dufourea novaeangliae (Sweat bee)		ATP binding [GO:0005524]; guanyl-nucleotide exchange factor activity [GO:0005085]; protein kinase activity [GO:0004672]; anatomical structure morphogenesis [GO:0009653]; cell differentiation [GO:0030154]; protein phosphorylation [GO:0006468]			anatomical structure morphogenesis [GO:0009653]; cell differentiation [GO:0030154]; protein phosphorylation [GO:0006468]		ATP binding [GO:0005524]; guanyl-nucleotide exchange factor activity [GO:0005085]; protein kinase activity [GO:0004672]	Protein kinase superfamily, CAMK Ser/Thr protein kinase family
A0A833S7R5	Twitchin	Frieseomelitta varia		ATP binding [GO:0005524]; protein kinase activity [GO:0004672]; anatomical structure morphogenesis [GO:0009653]; cell differentiation [GO:0030154]; protein phosphorylation [GO:0006468]			anatomical structure morphogenesis [GO:0009653]; cell differentiation [GO:0030154]; protein phosphorylation [GO:0006468]		ATP binding [GO:0005524]; protein kinase activity [GO:0004672]	Protein kinase superfamily, CAMK Ser/Thr protein kinase family
A0A833W593	Titin	Frieseomelitta varia		intracellular organelle [GO:0043229]; ATP binding [GO:0005524]; protein kinase activity [GO:0004672]; anatomical structure morphogenesis [GO:0009653]; cell differentiation [GO:0030154]; protein phosphorylation [GO:0006468]			anatomical structure morphogenesis [GO:0009653]; cell differentiation [GO:0030154]; protein phosphorylation [GO:0006468]	intracellular organelle [GO:0043229]	ATP binding [GO:0005524]; protein kinase activity [GO:0004672]	Protein kinase superfamily, CAMK Ser/Thr protein kinase family
A0A833RZB6	Laminin subunit alpha	Frieseomelitta varia		signaling receptor binding [GO:0005102]; animal organ development [GO:0048513]; cell adhesion [GO:0007155]; cell morphogenesis involved in differentiation [GO:0000904]; cellular component organization [GO:0016043]; regulation of cell adhesion [GO:0030155]; regulation of cell migration [GO:0030334]; regulation of embryonic development [GO:0045995]; system development [GO:0048731]			animal organ development [GO:0048513]; cell adhesion [GO:0007155]; cell morphogenesis involved in differentiation [GO:0000904]; cellular component organization [GO:0016043]; regulation of cell adhesion [GO:0030155]; regulation of cell migration [GO:0030334]; regulation of embryonic development [GO:0045995]; system development [GO:0048731]		signaling receptor binding [GO:0005102]
A0A154NWX1	Laminin subunit beta-1	Dufourea novaeangliae (Sweat bee)		basement membrane [GO:0005604]; membrane [GO:0016020]; pyrophosphatase activity [GO:0016462]; animal organ development [GO:0048513]; cell morphogenesis involved in differentiation [GO:0000904]; cellular component organization [GO:0016043]; system development [GO:0048731]			animal organ development [GO:0048513]; cell morphogenesis involved in differentiation [GO:0000904]; cellular component organization [GO:0016043]; system development [GO:0048731]	basement membrane [GO:0005604]; membrane [GO:0016020]	pyrophosphatase activity [GO:0016462]
A0A2A3E5U7	Talin-2	Apis cerana cerana (Oriental honeybee)		cytoplasm [GO:0005737]; cytoskeleton [GO:0005856]; focal adhesion [GO:0005925]; ruffle [GO:0001726]; actin filament binding [GO:0051015]; clathrin binding [GO:0030276]; structural constituent of cytoskeleton [GO:0005200]; animal organ morphogenesis [GO:0009887]; cell adhesion [GO:0007155]; endocytosis [GO:0006897]; neuron differentiation [GO:0030182]			animal organ morphogenesis [GO:0009887]; cell adhesion [GO:0007155]; endocytosis [GO:0006897]; neuron differentiation [GO:0030182]	cytoplasm [GO:0005737]; cytoskeleton [GO:0005856]; focal adhesion [GO:0005925]; ruffle [GO:0001726]	actin filament binding [GO:0051015]; clathrin binding [GO:0030276]; structural constituent of cytoskeleton [GO:0005200]
A0A154P289	Vacuolar proton pump subunit B (V-ATPase subunit B) (Vacuolar proton pump subunit B)	Dufourea novaeangliae (Sweat bee)		proton-transporting V-type ATPase, V1 domain [GO:0033180]; ATP binding [GO:0005524]; proton-transporting ATPase activity, rotational mechanism [GO:0046961]; ATP metabolic process [GO:0046034]		FUNCTION: Non-catalytic subunit of the V1 complex of vacuolar(H+)-ATPase (V-ATPase), a multisubunit enzyme composed of a peripheral complex (V1) that hydrolyzes ATP and a membrane integral complex (V0) that translocates protons. V-ATPase is responsible for acidifying and maintaining the pH of intracellular compartments and in some cell types, is targeted to the plasma membrane, where it is respon…	ATP metabolic process [GO:0046034]	proton-transporting V-type ATPase, V1 domain [GO:0033180]	ATP binding [GO:0005524]; proton-transporting ATPase activity, rotational mechanism [GO:0046961]	ATPase alpha/beta chains family
A0A822IFE0	H(+)-transporting two-sector ATPase (EC 7.1.2.2)	Ranitomeya imitator (mimic poison frog)		ATP binding [GO:0005524]; proton-transporting ATPase activity, rotational mechanism [GO:0046961]; ATP metabolic process [GO:0046034]			ATP metabolic process [GO:0046034]		ATP binding [GO:0005524]; proton-transporting ATPase activity, rotational mechanism [GO:0046961]	ATPase alpha/beta chains family
A0A833VIQ1	Calmodulin	Frieseomelitta varia		calcium ion binding [GO:0005509]; calcium-mediated signaling [GO:0019722]		FUNCTION: May be involved in calcium-mediated signal transduction. {ECO:0000256|RuleBase:RU367017}.	calcium-mediated signaling [GO:0019722]		calcium ion binding [GO:0005509]	Calmodulin family
A0A2A3ESV8	alpha-glucosidase (EC 3.2.1.20)	Apis cerana cerana (Oriental honeybee)		carbohydrate metabolic process [GO:0005975]			carbohydrate metabolic process [GO:0005975]
A0A2A3EA59	alpha-glucosidase (EC 3.2.1.20)	Apis cerana cerana (Oriental honeybee)		carbohydrate metabolic process [GO:0005975]			carbohydrate metabolic process [GO:0005975]
A0A2A3EJN3	Beta-galactosidase (EC 3.2.1.23) (Acid beta-galactosidase)	Apis cerana cerana (Oriental honeybee)		lysosome [GO:0005764]; beta-galactosidase activity [GO:0004565]; carbohydrate metabolic process [GO:0005975]			carbohydrate metabolic process [GO:0005975]	lysosome [GO:0005764]	beta-galactosidase activity [GO:0004565]	Glycosyl hydrolase 35 family
A0A154PA13	Chitinase-like protein Idgf4	Dufourea novaeangliae (Sweat bee)		extracellular region [GO:0005576]; chitin binding [GO:0008061]; carbohydrate metabolic process [GO:0005975]			carbohydrate metabolic process [GO:0005975]	extracellular region [GO:0005576]	chitin binding [GO:0008061]	Glycosyl hydrolase 18 family, IDGF subfamily
A0A833RKT2	alpha-glucosidase (EC 3.2.1.20)	Frieseomelitta varia		carbohydrate metabolic process [GO:0005975]			carbohydrate metabolic process [GO:0005975]
A0A833SBP4	Gal_mutarotas_2 domain-containing protein	Frieseomelitta varia		alpha-glucosidase activity [GO:0090599]; carbohydrate binding [GO:0030246]; carbohydrate metabolic process [GO:0005975]			carbohydrate metabolic process [GO:0005975]		alpha-glucosidase activity [GO:0090599]; carbohydrate binding [GO:0030246]	Glycosyl hydrolase 31 family
C0HLL5	Hyaluronidase B (EC 3.2.1.35) (Vesp v 2B)	Vespa velutina (Asian yellow-legged hornet)	25896434; 31923175	extracellular region [GO:0005576]; hyalurononglucosaminidase activity [GO:0004415]; carbohydrate metabolic process [GO:0005975]; defense response [GO:0006952]		FUNCTION: Hydrolyzes high molecular weight hyaluronic acid to produce small oligosaccharides. {ECO:0000250|UniProtKB:E0XKJ9}.	carbohydrate metabolic process [GO:0005975]; defense response [GO:0006952]	extracellular region [GO:0005576]	hyalurononglucosaminidase activity [GO:0004415]	Glycosyl hydrolase 56 family
C0HLL4	Hyaluronidase A (EC 3.2.1.35) (Vesp v 2A)	Vespa velutina (Asian yellow-legged hornet)	25896434; 31923175	extracellular region [GO:0005576]; hyalurononglucosaminidase activity [GO:0004415]; carbohydrate metabolic process [GO:0005975]; defense response [GO:0006952]		FUNCTION: May hydrolyze high molecular weight hyaluronic acid to produce small oligosaccharides. {ECO:0000305|PubMed:31923175}.	carbohydrate metabolic process [GO:0005975]; defense response [GO:0006952]	extracellular region [GO:0005576]	hyalurononglucosaminidase activity [GO:0004415]	Glycosyl hydrolase 56 family
A0A154PH44	Glycerol-3-phosphate dehydrogenase [NAD(+)] (EC 1.1.1.8)	Dufourea novaeangliae (Sweat bee)		glycerol-3-phosphate dehydrogenase complex [GO:0009331]; glycerol-3-phosphate dehydrogenase [NAD(P)+] activity [GO:0047952]; NAD binding [GO:0051287]; protein homodimerization activity [GO:0042803]; carbohydrate metabolic process [GO:0005975]; glycerol-3-phosphate catabolic process [GO:0046168]; glycerophospholipid metabolic process [GO:0006650]	PATHWAY: Lipid metabolism. {ECO:0000256|ARBA:ARBA00005189}.; PATHWAY: Phospholipid metabolism; alpha-glycerophosphate cycle. {ECO:0000256|ARBA:ARBA00005192}.		carbohydrate metabolic process [GO:0005975]; glycerol-3-phosphate catabolic process [GO:0046168]; glycerophospholipid metabolic process [GO:0006650]	glycerol-3-phosphate dehydrogenase complex [GO:0009331]	glycerol-3-phosphate dehydrogenase [NAD(P)+] activity [GO:0047952]; NAD binding [GO:0051287]; protein homodimerization activity [GO:0042803]	NAD-dependent glycerol-3-phosphate dehydrogenase family
A0A1V9XK41	Glycerol-3-phosphate dehydrogenase [NAD(+)] (EC 1.1.1.8)	Tropilaelaps mercedesae	28327890	glycerol-3-phosphate dehydrogenase complex [GO:0009331]; glycerol-3-phosphate dehydrogenase [NAD(P)+] activity [GO:0047952]; NAD binding [GO:0051287]; carbohydrate metabolic process [GO:0005975]; glycerol-3-phosphate catabolic process [GO:0046168]; glycerophospholipid metabolic process [GO:0006650]	PATHWAY: Lipid metabolism. {ECO:0000256|ARBA:ARBA00005189}.; PATHWAY: Phospholipid metabolism; alpha-glycerophosphate cycle. {ECO:0000256|ARBA:ARBA00005192}.		carbohydrate metabolic process [GO:0005975]; glycerol-3-phosphate catabolic process [GO:0046168]; glycerophospholipid metabolic process [GO:0006650]	glycerol-3-phosphate dehydrogenase complex [GO:0009331]	glycerol-3-phosphate dehydrogenase [NAD(P)+] activity [GO:0047952]; NAD binding [GO:0051287]	NAD-dependent glycerol-3-phosphate dehydrogenase family
A0A833W1X0	Alpha-galactosidase (EC 3.2.1.-)	Frieseomelitta varia		lysosome [GO:0005764]; hydrolase activity, hydrolyzing O-glycosyl compounds [GO:0004553]; carbohydrate metabolic process [GO:0005975]; lipid metabolic process [GO:0006629]			carbohydrate metabolic process [GO:0005975]; lipid metabolic process [GO:0006629]	lysosome [GO:0005764]	hydrolase activity, hydrolyzing O-glycosyl compounds [GO:0004553]	Glycosyl hydrolase 27 family
A0A2A3EJ73	Transaldolase (EC 2.2.1.2)	Apis cerana cerana (Oriental honeybee)		cytoplasm [GO:0005737]; transaldolase activity [GO:0004801]; carbohydrate metabolic process [GO:0005975]; pentose-phosphate shunt [GO:0006098]	PATHWAY: Carbohydrate degradation; pentose phosphate pathway; D-glyceraldehyde 3-phosphate and beta-D-fructose 6-phosphate from D-ribose 5-phosphate and D-xylulose 5-phosphate (non-oxidative stage): step 2/3. {ECO:0000256|ARBA:ARBA00004857, ECO:0000256|RuleBase:RU000501}.	FUNCTION: Catalyzes the rate-limiting step of the non-oxidative phase in the pentose phosphate pathway. Catalyzes the reversible conversion of sedheptulose-7-phosphate and D-glyceraldehyde 3-phosphate into erythrose-4-phosphate and beta-D-fructose 6-phosphate. {ECO:0000256|RuleBase:RU000501}.	carbohydrate metabolic process [GO:0005975]; pentose-phosphate shunt [GO:0006098]	cytoplasm [GO:0005737]	transaldolase activity [GO:0004801]	Transaldolase family, Type 1 subfamily
A0A154PH15	Vinculin	Dufourea novaeangliae (Sweat bee)		actin cytoskeleton [GO:0015629]; adherens junction [GO:0005912]; cytoplasm [GO:0005737]; plasma membrane [GO:0005886]; actin filament binding [GO:0051015]; structural molecule activity [GO:0005198]; cell adhesion [GO:0007155]			cell adhesion [GO:0007155]	actin cytoskeleton [GO:0015629]; adherens junction [GO:0005912]; cytoplasm [GO:0005737]; plasma membrane [GO:0005886]	actin filament binding [GO:0051015]; structural molecule activity [GO:0005198]	Vinculin/alpha-catenin family
A0A2A3EL94	Dihydrolipoyl dehydrogenase (EC 1.8.1.4)	Apis cerana cerana (Oriental honeybee)		dihydrolipoyl dehydrogenase activity [GO:0004148]; flavin adenine dinucleotide binding [GO:0050660]; cell redox homeostasis [GO:0045454]			cell redox homeostasis [GO:0045454]		dihydrolipoyl dehydrogenase activity [GO:0004148]; flavin adenine dinucleotide binding [GO:0050660]	Class-I pyridine nucleotide-disulfide oxidoreductase family
A0A833W9E6	Dihydrolipoyl dehydrogenase (EC 1.8.1.4)	Frieseomelitta varia		dihydrolipoyl dehydrogenase activity [GO:0004148]; flavin adenine dinucleotide binding [GO:0050660]; cell redox homeostasis [GO:0045454]			cell redox homeostasis [GO:0045454]		dihydrolipoyl dehydrogenase activity [GO:0004148]; flavin adenine dinucleotide binding [GO:0050660]	Class-I pyridine nucleotide-disulfide oxidoreductase family
A0A154PD98	Nidogen-1	Dufourea novaeangliae (Sweat bee)		calcium ion binding [GO:0005509]; cell-matrix adhesion [GO:0007160]			cell-matrix adhesion [GO:0007160]		calcium ion binding [GO:0005509]
A0A833SDV3	Paxillin	Frieseomelitta varia		cell cortex [GO:0005938]; cytoskeleton [GO:0005856]; focal adhesion [GO:0005925]; metal ion binding [GO:0046872]; cell-matrix adhesion [GO:0007160]			cell-matrix adhesion [GO:0007160]	cell cortex [GO:0005938]; cytoskeleton [GO:0005856]; focal adhesion [GO:0005925]	metal ion binding [GO:0046872]
A0A2A3EMK6	Alpha-actinin, sarcomeric	Apis cerana cerana (Oriental honeybee)		cytoplasm [GO:0005737]; actin binding [GO:0003779]; calcium ion binding [GO:0005509]; cellular component organization [GO:0016043]			cellular component organization [GO:0016043]	cytoplasm [GO:0005737]	actin binding [GO:0003779]; calcium ion binding [GO:0005509]	Alpha-actinin family
A0A154PKM2	Phosphotransferase (EC 2.7.1.-)	Dufourea novaeangliae (Sweat bee)		ATP binding [GO:0005524]; glucokinase activity [GO:0004340]; glucose binding [GO:0005536]; cellular glucose homeostasis [GO:0001678]; glycolytic process [GO:0006096]; hexose metabolic process [GO:0019318]	PATHWAY: Carbohydrate degradation; glycolysis; D-glyceraldehyde 3-phosphate and glycerone phosphate from D-glucose: step 1/4. {ECO:0000256|ARBA:ARBA00004888}.; PATHWAY: Carbohydrate metabolism; hexose metabolism. {ECO:0000256|ARBA:ARBA00005028}.		cellular glucose homeostasis [GO:0001678]; glycolytic process [GO:0006096]; hexose metabolic process [GO:0019318]		ATP binding [GO:0005524]; glucokinase activity [GO:0004340]; glucose binding [GO:0005536]	Hexokinase family
A0A822GLX5	Serotransferrin (Beta-1 metal-binding globulin) (Siderophilin)	Ranitomeya imitator (mimic poison frog)		extracellular space [GO:0005615]; ferric iron binding [GO:0008199]; cellular iron ion homeostasis [GO:0006879]; iron ion transport [GO:0006826]		FUNCTION: Transferrins are iron binding transport proteins which can bind two Fe(3+) ions in association with the binding of an anion, usually bicarbonate. It is responsible for the transport of iron from sites of absorption and heme degradation to those of storage and utilization. Serum transferrin may also have a further role in stimulating cell proliferation. {ECO:0000256|ARBA:ARBA00025170}.	cellular iron ion homeostasis [GO:0006879]; iron ion transport [GO:0006826]	extracellular space [GO:0005615]	ferric iron binding [GO:0008199]	Transferrin family
A0A154PQH0	Glycogenin-1	Dufourea novaeangliae (Sweat bee)		glycosyltransferase activity [GO:0016757]; cellular macromolecule biosynthetic process [GO:0034645]			cellular macromolecule biosynthetic process [GO:0034645]		glycosyltransferase activity [GO:0016757]
A0A154PEK6	Citrate synthase	Dufourea novaeangliae (Sweat bee)		mitochondrial matrix [GO:0005759]; citrate (Si)-synthase activity [GO:0004108]; citrate metabolic process [GO:0006101]; tricarboxylic acid cycle [GO:0006099]	PATHWAY: Carbohydrate metabolism; tricarboxylic acid cycle; isocitrate from oxaloacetate: step 1/2. {ECO:0000256|ARBA:ARBA00004751}.		citrate metabolic process [GO:0006101]; tricarboxylic acid cycle [GO:0006099]	mitochondrial matrix [GO:0005759]	citrate (Si)-synthase activity [GO:0004108]	Citrate synthase family
A0A833SA96	Nucleoside diphosphate kinase (EC 2.7.4.6)	Frieseomelitta varia		ATP binding [GO:0005524]; nucleoside diphosphate kinase activity [GO:0004550]; CTP biosynthetic process [GO:0006241]; GTP biosynthetic process [GO:0006183]; nucleoside diphosphate phosphorylation [GO:0006165]; UTP biosynthetic process [GO:0006228]			CTP biosynthetic process [GO:0006241]; GTP biosynthetic process [GO:0006183]; nucleoside diphosphate phosphorylation [GO:0006165]; UTP biosynthetic process [GO:0006228]		ATP binding [GO:0005524]; nucleoside diphosphate kinase activity [GO:0004550]
A0A3M0PGI6	Carbamoyl-phosphate synthase large chain (EC 6.3.5.5) (Carbamoyl-phosphate synthetase ammonia chain)	Lactobacillus sp. ESL0259		ATP binding [GO:0005524]; carbamoyl-phosphate synthase (glutamine-hydrolyzing) activity [GO:0004088]; metal ion binding [GO:0046872]; 'de novo' UMP biosynthetic process [GO:0044205]; arginine biosynthetic process [GO:0006526]	PATHWAY: Amino-acid biosynthesis; L-arginine biosynthesis; carbamoyl phosphate from bicarbonate: step 1/1. {ECO:0000256|HAMAP-Rule:MF_01210}.; PATHWAY: Pyrimidine metabolism; UMP biosynthesis via de novo pathway; (S)-dihydroorotate from bicarbonate: step 1/3. {ECO:0000256|ARBA:ARBA00004812, ECO:0000256|HAMAP-Rule:MF_01210}.		'de novo' UMP biosynthetic process [GO:0044205]; arginine biosynthetic process [GO:0006526]		ATP binding [GO:0005524]; carbamoyl-phosphate synthase (glutamine-hydrolyzing) activity [GO:0004088]; metal ion binding [GO:0046872]	CarB family
A0A833W8Q7	6-phosphogluconate dehydrogenase, decarboxylating (EC 1.1.1.44)	Frieseomelitta varia		NADP binding [GO:0050661]; phosphogluconate dehydrogenase (decarboxylating) activity [GO:0004616]; D-gluconate metabolic process [GO:0019521]; pentose-phosphate shunt [GO:0006098]	PATHWAY: Carbohydrate degradation; pentose phosphate pathway; D-ribulose 5-phosphate from D-glucose 6-phosphate (oxidative stage): step 3/3. {ECO:0000256|ARBA:ARBA00004874, ECO:0000256|PIRNR:PIRNR000109, ECO:0000256|RuleBase:RU000485}.	FUNCTION: Catalyzes the oxidative decarboxylation of 6-phosphogluconate to ribulose 5-phosphate and CO(2), with concomitant reduction of NADP to NADPH. {ECO:0000256|PIRNR:PIRNR000109}.	D-gluconate metabolic process [GO:0019521]; pentose-phosphate shunt [GO:0006098]		NADP binding [GO:0050661]; phosphogluconate dehydrogenase (decarboxylating) activity [GO:0004616]	6-phosphogluconate dehydrogenase family
Q8B3M2	Genome polyprotein	Deformed wing virus	16641291; 28270616	cytoplasm [GO:0005737]; host cell cytoplasm [GO:0030430]; host cell membrane [GO:0033644]; membrane [GO:0016020]; viral capsid [GO:0019028]; ATP binding [GO:0005524]; cysteine-type endopeptidase activity [GO:0004197]; RNA binding [GO:0003723]; RNA helicase activity [GO:0003724]; RNA-dependent RNA polymerase activity [GO:0003968]; structural molecule activity [GO:0005198]; DNA-templated transcript…			DNA-templated transcription [GO:0006351]; proteolysis [GO:0006508]; RNA-protein covalent cross-linking [GO:0018144]; viral RNA genome replication [GO:0039694]	cytoplasm [GO:0005737]; host cell cytoplasm [GO:0030430]; host cell membrane [GO:0033644]; membrane [GO:0016020]; viral capsid [GO:0019028]	ATP binding [GO:0005524]; cysteine-type endopeptidase activity [GO:0004197]; RNA binding [GO:0003723]; RNA helicase activity [GO:0003724]; RNA-dependent RNA polymerase activity [GO:0003968]; structural molecule activity [GO:0005198]
A0A833RSF2	Succinate dehydrogenase [ubiquinone] flavoprotein subunit, mitochondrial (EC 1.3.5.1)	Frieseomelitta varia		mitochondrial inner membrane [GO:0005743]; flavin adenine dinucleotide binding [GO:0050660]; oxidoreductase activity, acting on the CH-CH group of donors [GO:0016627]; electron transport chain [GO:0022900]; tricarboxylic acid cycle [GO:0006099]	PATHWAY: Carbohydrate metabolism; tricarboxylic acid cycle; fumarate from succinate (eukaryal route): step 1/1. {ECO:0000256|ARBA:ARBA00004788, ECO:0000256|RuleBase:RU362051}.	FUNCTION: Flavoprotein (FP) subunit of succinate dehydrogenase (SDH) that is involved in complex II of the mitochondrial electron transport chain and is responsible for transferring electrons from succinate to ubiquinone (coenzyme Q). {ECO:0000256|RuleBase:RU362051}.	electron transport chain [GO:0022900]; tricarboxylic acid cycle [GO:0006099]	mitochondrial inner membrane [GO:0005743]	flavin adenine dinucleotide binding [GO:0050660]; oxidoreductase activity, acting on the CH-CH group of donors [GO:0016627]	FAD-dependent oxidoreductase 2 family, FRD/SDH subfamily
A0A154P037	Lambda-crystallin like protein	Dufourea novaeangliae (Sweat bee)		NAD+ binding [GO:0070403]; oxidoreductase activity, acting on the CH-OH group of donors, NAD or NADP as acceptor [GO:0016616]; fatty acid metabolic process [GO:0006631]			fatty acid metabolic process [GO:0006631]		NAD+ binding [GO:0070403]; oxidoreductase activity, acting on the CH-OH group of donors, NAD or NADP as acceptor [GO:0016616]	3-hydroxyacyl-CoA dehydrogenase family
A0A2A3E214	alpha-L-fucosidase (EC 3.2.1.51)	Apis cerana cerana (Oriental honeybee)		alpha-L-fucosidase activity [GO:0004560]; fucose metabolic process [GO:0006004]		FUNCTION: Alpha-L-fucosidase is responsible for hydrolyzing the alpha-1,6-linked fucose joined to the reducing-end N-acetylglucosamine of the carbohydrate moieties of glycoproteins. {ECO:0000256|ARBA:ARBA00004071}.	fucose metabolic process [GO:0006004]		alpha-L-fucosidase activity [GO:0004560]	Glycosyl hydrolase 29 family
A0A154PJQ2	alpha-L-fucosidase (EC 3.2.1.51)	Dufourea novaeangliae (Sweat bee)		alpha-L-fucosidase activity [GO:0004560]; fucose metabolic process [GO:0006004]		FUNCTION: Alpha-L-fucosidase is responsible for hydrolyzing the alpha-1,6-linked fucose joined to the reducing-end N-acetylglucosamine of the carbohydrate moieties of glycoproteins. {ECO:0000256|ARBA:ARBA00004071}.	fucose metabolic process [GO:0006004]		alpha-L-fucosidase activity [GO:0004560]	Glycosyl hydrolase 29 family
A0A2A3E3Z9	Triosephosphate isomerase (EC 5.3.1.1)	Apis cerana cerana (Oriental honeybee)		triose-phosphate isomerase activity [GO:0004807]; gluconeogenesis [GO:0006094]; glycolytic process [GO:0006096]	PATHWAY: Carbohydrate biosynthesis; gluconeogenesis. {ECO:0000256|RuleBase:RU363013}.; PATHWAY: Carbohydrate degradation; glycolysis; D-glyceraldehyde 3-phosphate from glycerone phosphate: step 1/1. {ECO:0000256|RuleBase:RU363013}.		gluconeogenesis [GO:0006094]; glycolytic process [GO:0006096]		triose-phosphate isomerase activity [GO:0004807]	Triosephosphate isomerase family
A0A6B2FC56	Triosephosphate isomerase (EC 5.3.1.1)	Bothriechis nigroviridis (Black-speckled palm pit viper)		methylglyoxal synthase activity [GO:0008929]; triose-phosphate isomerase activity [GO:0004807]; gluconeogenesis [GO:0006094]; glycolytic process [GO:0006096]	PATHWAY: Carbohydrate biosynthesis; gluconeogenesis. {ECO:0000256|RuleBase:RU363013}.; PATHWAY: Carbohydrate degradation; glycolysis; D-glyceraldehyde 3-phosphate from glycerone phosphate: step 1/1. {ECO:0000256|RuleBase:RU363013}.	FUNCTION: It is also responsible for the non-negligible production of methylglyoxal a reactive cytotoxic side-product that modifies and can alter proteins, DNA and lipids. {ECO:0000256|ARBA:ARBA00004104}.; FUNCTION: Triosephosphate isomerase is an extremely efficient metabolic enzyme that catalyzes the interconversion between dihydroxyacetone phosphate (DHAP) and D-glyceraldehyde-3-phosphate (G3P…	gluconeogenesis [GO:0006094]; glycolytic process [GO:0006096]		methylglyoxal synthase activity [GO:0008929]; triose-phosphate isomerase activity [GO:0004807]	Triosephosphate isomerase family
R9QKY2	Glucose-6-phosphate isomerase (EC 5.3.1.9)	Bombus humilis (Brown-banded carder bee)	23750269	carbohydrate derivative binding [GO:0097367]; glucose-6-phosphate isomerase activity [GO:0004347]; gluconeogenesis [GO:0006094]; glycolytic process [GO:0006096]	PATHWAY: Carbohydrate degradation; glycolysis; D-glyceraldehyde 3-phosphate and glycerone phosphate from D-glucose: step 2/4. {ECO:0000256|ARBA:ARBA00004926, ECO:0000256|RuleBase:RU000612}.		gluconeogenesis [GO:0006094]; glycolytic process [GO:0006096]		carbohydrate derivative binding [GO:0097367]; glucose-6-phosphate isomerase activity [GO:0004347]	GPI family
C0IPU3	Phosphoenolpyruvate carboxykinase	Xylocopa caerulea		GTP binding [GO:0005525]; kinase activity [GO:0016301]; phosphoenolpyruvate carboxykinase activity [GO:0004611]; gluconeogenesis [GO:0006094]; phosphorylation [GO:0016310]			gluconeogenesis [GO:0006094]; phosphorylation [GO:0016310]		GTP binding [GO:0005525]; kinase activity [GO:0016301]; phosphoenolpyruvate carboxykinase activity [GO:0004611]
A0A2A3E744	Pyruvate carboxylase (EC 6.4.1.1)	Apis cerana cerana (Oriental honeybee)		ATP binding [GO:0005524]; metal ion binding [GO:0046872]; pyruvate carboxylase activity [GO:0004736]; gluconeogenesis [GO:0006094]; pyruvate metabolic process [GO:0006090]		FUNCTION: Catalyzes a 2-step reaction, involving the ATP-dependent carboxylation of the covalently attached biotin in the first step and the transfer of the carboxyl group to pyruvate in the second. {ECO:0000256|PIRNR:PIRNR001594}.	gluconeogenesis [GO:0006094]; pyruvate metabolic process [GO:0006090]		ATP binding [GO:0005524]; metal ion binding [GO:0046872]; pyruvate carboxylase activity [GO:0004736]
A0A1T4LCN6	Glyceraldehyde-3-phosphate dehydrogenase (EC 1.2.1.-)	Enterobacter agglomerans (Erwinia herbicola) (Pantoea agglomerans)	32966572	glyceraldehyde-3-phosphate dehydrogenase (NAD+) (phosphorylating) activity [GO:0004365]; NAD binding [GO:0051287]; NADP binding [GO:0050661]; glucose metabolic process [GO:0006006]		FUNCTION: Catalyzes the oxidative phosphorylation of glyceraldehyde 3-phosphate (G3P) to 1,3-bisphosphoglycerate (BPG) using the cofactor NAD. The first reaction step involves the formation of a hemiacetal intermediate between G3P and a cysteine residue, and this hemiacetal intermediate is then oxidized to a thioester, with concomitant reduction of NAD to NADH. The reduced NADH is then exchanged …	glucose metabolic process [GO:0006006]		glyceraldehyde-3-phosphate dehydrogenase (NAD+) (phosphorylating) activity [GO:0004365]; NAD binding [GO:0051287]; NADP binding [GO:0050661]	Glyceraldehyde-3-phosphate dehydrogenase family
A0A2A3E509	Glyceraldehyde-3-phosphate dehydrogenase (EC 1.2.1.12)	Apis cerana cerana (Oriental honeybee)		glyceraldehyde-3-phosphate dehydrogenase (NAD+) (phosphorylating) activity [GO:0004365]; NAD binding [GO:0051287]; NADP binding [GO:0050661]; glucose metabolic process [GO:0006006]; glycolytic process [GO:0006096]	PATHWAY: Carbohydrate degradation; glycolysis; pyruvate from D-glyceraldehyde 3-phosphate: step 1/5. {ECO:0000256|ARBA:ARBA00004869, ECO:0000256|RuleBase:RU361160}.		glucose metabolic process [GO:0006006]; glycolytic process [GO:0006096]		glyceraldehyde-3-phosphate dehydrogenase (NAD+) (phosphorylating) activity [GO:0004365]; NAD binding [GO:0051287]; NADP binding [GO:0050661]	Glyceraldehyde-3-phosphate dehydrogenase family
A0A5P1MU32	Glyceraldehyde-3-phosphate dehydrogenase (EC 1.2.1.12)	Frieseomelitta varia		glyceraldehyde-3-phosphate dehydrogenase (NAD+) (phosphorylating) activity [GO:0004365]; NAD binding [GO:0051287]; NADP binding [GO:0050661]; glucose metabolic process [GO:0006006]; glycolytic process [GO:0006096]	PATHWAY: Carbohydrate degradation; glycolysis; pyruvate from D-glyceraldehyde 3-phosphate: step 1/5. {ECO:0000256|ARBA:ARBA00004869, ECO:0000256|RuleBase:RU361160}.		glucose metabolic process [GO:0006006]; glycolytic process [GO:0006096]		glyceraldehyde-3-phosphate dehydrogenase (NAD+) (phosphorylating) activity [GO:0004365]; NAD binding [GO:0051287]; NADP binding [GO:0050661]	Glyceraldehyde-3-phosphate dehydrogenase family
A0A821LTU2	Glyceraldehyde-3-phosphate dehydrogenase (EC 1.2.1.12)	Ranitomeya imitator (mimic poison frog)		glyceraldehyde-3-phosphate dehydrogenase (NAD+) (phosphorylating) activity [GO:0004365]; NAD binding [GO:0051287]; NADP binding [GO:0050661]; glucose metabolic process [GO:0006006]; glycolytic process [GO:0006096]	PATHWAY: Carbohydrate degradation; glycolysis; pyruvate from D-glyceraldehyde 3-phosphate: step 1/5. {ECO:0000256|ARBA:ARBA00004869, ECO:0000256|RuleBase:RU361160}.		glucose metabolic process [GO:0006006]; glycolytic process [GO:0006096]		glyceraldehyde-3-phosphate dehydrogenase (NAD+) (phosphorylating) activity [GO:0004365]; NAD binding [GO:0051287]; NADP binding [GO:0050661]	Glyceraldehyde-3-phosphate dehydrogenase family
A0A2A3E9Y7	glutamine synthetase (EC 6.3.1.2)	Apis cerana cerana (Oriental honeybee)		glutamate-ammonia ligase activity [GO:0004356]; glutamine biosynthetic process [GO:0006542]			glutamine biosynthetic process [GO:0006542]		glutamate-ammonia ligase activity [GO:0004356]	Glutamine synthetase family
A0A833SC01	Glycerol-3-phosphate dehydrogenase (EC 1.1.5.3)	Frieseomelitta varia		glycerol-3-phosphate dehydrogenase complex [GO:0009331]; mitochondrion [GO:0005739]; calcium ion binding [GO:0005509]; glycerol-3-phosphate dehydrogenase (quinone) activity [GO:0004368]; glycerol-3-phosphate metabolic process [GO:0006072]			glycerol-3-phosphate metabolic process [GO:0006072]	glycerol-3-phosphate dehydrogenase complex [GO:0009331]; mitochondrion [GO:0005739]	calcium ion binding [GO:0005509]; glycerol-3-phosphate dehydrogenase (quinone) activity [GO:0004368]	FAD-dependent glycerol-3-phosphate dehydrogenase family
A0A2A3E2K9	1,4-alpha-glucan branching enzyme (EC 2.4.1.18)	Apis cerana cerana (Oriental honeybee)		cytoplasm [GO:0005737]; 1,4-alpha-glucan branching enzyme activity [GO:0003844]; 1,4-alpha-glucan branching enzyme activity (using a glucosylated glycogenin as primer for glycogen synthesis) [GO:0102752]; cation binding [GO:0043169]; hydrolase activity, hydrolyzing O-glycosyl compounds [GO:0004553]; glycogen biosynthetic process [GO:0005978]			glycogen biosynthetic process [GO:0005978]	cytoplasm [GO:0005737]	1,4-alpha-glucan branching enzyme activity [GO:0003844]; 1,4-alpha-glucan branching enzyme activity (using a glucosylated glycogenin as primer for glycogen synthesis) [GO:0102752]; cation binding [GO:0043169]; hydrolase activity, hydrolyzing O-glycosyl compounds [GO:0004553]	Glycosyl hydrolase 13 family, GlgB subfamily
A0A833SK77	Glycogen debranching enzyme (EC 2.4.1.25) (EC 3.2.1.33) (Glycogen debrancher)	Frieseomelitta varia		cytoplasm [GO:0005737]; 4-alpha-glucanotransferase activity [GO:0004134]; amylo-alpha-1,6-glucosidase activity [GO:0004135]; glycogen biosynthetic process [GO:0005978]; glycogen catabolic process [GO:0005980]		FUNCTION: Multifunctional enzyme acting as 1,4-alpha-D-glucan:1,4-alpha-D-glucan 4-alpha-D-glycosyltransferase and amylo-1,6-glucosidase in glycogen degradation. {ECO:0000256|ARBA:ARBA00003530}.	glycogen biosynthetic process [GO:0005978]; glycogen catabolic process [GO:0005980]	cytoplasm [GO:0005737]	4-alpha-glucanotransferase activity [GO:0004134]; amylo-alpha-1,6-glucosidase activity [GO:0004135]	Glycogen debranching enzyme family
A0A2A3E8J6	UTP--glucose-1-phosphate uridylyltransferase (EC 2.7.7.9)	Apis cerana cerana (Oriental honeybee)		UTP:glucose-1-phosphate uridylyltransferase activity [GO:0003983]; glycogen biosynthetic process [GO:0005978]; UDP-glucose metabolic process [GO:0006011]	PATHWAY: Glycan biosynthesis; glycogen biosynthesis. {ECO:0000256|ARBA:ARBA00004964}.	FUNCTION: UTP--glucose-1-phosphate uridylyltransferase catalyzing the conversion of glucose-1-phosphate into UDP-glucose, a crucial precursor for the production of glycogen. {ECO:0000256|ARBA:ARBA00023579}.	glycogen biosynthetic process [GO:0005978]; UDP-glucose metabolic process [GO:0006011]		UTP:glucose-1-phosphate uridylyltransferase activity [GO:0003983]	UDPGP type 1 family
A0A2A3E7B2	Alpha-1,4 glucan phosphorylase (EC 2.4.1.1)	Apis cerana cerana (Oriental honeybee)		glycogen phosphorylase activity [GO:0008184]; linear malto-oligosaccharide phosphorylase activity [GO:0102250]; pyridoxal phosphate binding [GO:0030170]; SHG alpha-glucan phosphorylase activity [GO:0102499]; glycogen metabolic process [GO:0005977]		FUNCTION: Allosteric enzyme that catalyzes the rate-limiting step in glycogen catabolism, the phosphorolytic cleavage of glycogen to produce glucose-1-phosphate, and plays a central role in maintaining cellular and organismal glucose homeostasis. {ECO:0000256|RuleBase:RU000587}.	glycogen metabolic process [GO:0005977]		glycogen phosphorylase activity [GO:0008184]; linear malto-oligosaccharide phosphorylase activity [GO:0102250]; pyridoxal phosphate binding [GO:0030170]; SHG alpha-glucan phosphorylase activity [GO:0102499]	Glycogen phosphorylase family
A0A154PP88	Alpha-1,4 glucan phosphorylase (EC 2.4.1.1)	Dufourea novaeangliae (Sweat bee)		glycogen phosphorylase activity [GO:0008184]; linear malto-oligosaccharide phosphorylase activity [GO:0102250]; pyridoxal phosphate binding [GO:0030170]; SHG alpha-glucan phosphorylase activity [GO:0102499]; glycogen metabolic process [GO:0005977]		FUNCTION: Allosteric enzyme that catalyzes the rate-limiting step in glycogen catabolism, the phosphorolytic cleavage of glycogen to produce glucose-1-phosphate, and plays a central role in maintaining cellular and organismal glucose homeostasis. {ECO:0000256|RuleBase:RU000587}.	glycogen metabolic process [GO:0005977]		glycogen phosphorylase activity [GO:0008184]; linear malto-oligosaccharide phosphorylase activity [GO:0102250]; pyridoxal phosphate binding [GO:0030170]; SHG alpha-glucan phosphorylase activity [GO:0102499]	Glycogen phosphorylase family
A0A154PMG3	Phosphoglycerate mutase (EC 5.4.2.11) (EC 5.4.2.4)	Dufourea novaeangliae (Sweat bee)		bisphosphoglycerate mutase activity [GO:0004082]; phosphoglycerate mutase activity [GO:0004619]; glycolytic process [GO:0006096]			glycolytic process [GO:0006096]		bisphosphoglycerate mutase activity [GO:0004082]; phosphoglycerate mutase activity [GO:0004619]	Phosphoglycerate mutase family, BPG-dependent PGAM subfamily
A0A2A3EKS3	Fructose-bisphosphate aldolase (EC 4.1.2.13)	Apis cerana cerana (Oriental honeybee)		fructose-bisphosphate aldolase activity [GO:0004332]; glycolytic process [GO:0006096]	PATHWAY: Carbohydrate degradation; glycolysis; D-glyceraldehyde 3-phosphate and glycerone phosphate from D-glucose: step 4/4. {ECO:0000256|ARBA:ARBA00004714, ECO:0000256|RuleBase:RU004257}.		glycolytic process [GO:0006096]		fructose-bisphosphate aldolase activity [GO:0004332]	Class I fructose-bisphosphate aldolase family
A0A154PQ04	Fructose-bisphosphate aldolase (EC 4.1.2.13)	Dufourea novaeangliae (Sweat bee)		fructose-bisphosphate aldolase activity [GO:0004332]; glycolytic process [GO:0006096]	PATHWAY: Carbohydrate degradation; glycolysis; D-glyceraldehyde 3-phosphate and glycerone phosphate from D-glucose: step 4/4. {ECO:0000256|ARBA:ARBA00004714, ECO:0000256|RuleBase:RU004257}.		glycolytic process [GO:0006096]		fructose-bisphosphate aldolase activity [GO:0004332]	Class I fructose-bisphosphate aldolase family
A0A833W2V9	Fructose-bisphosphate aldolase (EC 4.1.2.13)	Frieseomelitta varia		membrane [GO:0016020]; fructose-bisphosphate aldolase activity [GO:0004332]; glycolytic process [GO:0006096]	PATHWAY: Carbohydrate degradation; glycolysis; D-glyceraldehyde 3-phosphate and glycerone phosphate from D-glucose: step 4/4. {ECO:0000256|ARBA:ARBA00004714, ECO:0000256|RuleBase:RU004257}.		glycolytic process [GO:0006096]	membrane [GO:0016020]	fructose-bisphosphate aldolase activity [GO:0004332]	Class I fructose-bisphosphate aldolase family
A0A833S5I5	Phosphoglycerate kinase (EC 2.7.2.3)	Frieseomelitta varia		ATP binding [GO:0005524]; phosphoglycerate kinase activity [GO:0004618]; glycolytic process [GO:0006096]	PATHWAY: Carbohydrate degradation; glycolysis; pyruvate from D-glyceraldehyde 3-phosphate: step 2/5. {ECO:0000256|ARBA:ARBA00004838, ECO:0000256|RuleBase:RU000532}.		glycolytic process [GO:0006096]		ATP binding [GO:0005524]; phosphoglycerate kinase activity [GO:0004618]	Phosphoglycerate kinase family
A0A0L0AW36	Enolase (EC 4.2.1.11) (2-phospho-D-glycerate hydro-lyase) (2-phosphoglycerate dehydratase)	Klebsiella sp. RIT-PI-d		cell surface [GO:0009986]; extracellular region [GO:0005576]; phosphopyruvate hydratase complex [GO:0000015]; magnesium ion binding [GO:0000287]; phosphopyruvate hydratase activity [GO:0004634]; glycolytic process [GO:0006096]	PATHWAY: Carbohydrate degradation; glycolysis; pyruvate from D-glyceraldehyde 3-phosphate: step 4/5. {ECO:0000256|ARBA:ARBA00005031, ECO:0000256|HAMAP-Rule:MF_00318}.	FUNCTION: Catalyzes the reversible conversion of 2-phosphoglycerate into phosphoenolpyruvate. It is essential for the degradation of carbohydrates via glycolysis. {ECO:0000256|HAMAP-Rule:MF_00318}.	glycolytic process [GO:0006096]	cell surface [GO:0009986]; extracellular region [GO:0005576]; phosphopyruvate hydratase complex [GO:0000015]	magnesium ion binding [GO:0000287]; phosphopyruvate hydratase activity [GO:0004634]	Enolase family
A0A154PPS0	phosphopyruvate hydratase (EC 4.2.1.11) (2-phospho-D-glycerate hydro-lyase)	Dufourea novaeangliae (Sweat bee)		phosphopyruvate hydratase complex [GO:0000015]; magnesium ion binding [GO:0000287]; phosphopyruvate hydratase activity [GO:0004634]; glycolytic process [GO:0006096]	PATHWAY: Carbohydrate degradation; glycolysis; pyruvate from D-glyceraldehyde 3-phosphate: step 4/5. {ECO:0000256|ARBA:ARBA00005031}.		glycolytic process [GO:0006096]	phosphopyruvate hydratase complex [GO:0000015]	magnesium ion binding [GO:0000287]; phosphopyruvate hydratase activity [GO:0004634]	Enolase family
P0DMB8	Phospholipase A1 verutoxin-2b (PLA1) (VT-2b) (EC 3.1.1.32) (EC 3.1.1.5)	Vespa velutina (Asian yellow-legged hornet)	10484737	extracellular region [GO:0005576]; 1-acyl-2-lysophosphatidylserine acylhydrolase activity [GO:0052740]; lysophospholipase activity [GO:0004622]; phosphatidylserine 1-acylhydrolase activity [GO:0052739]; phospholipase A1 activity [GO:0008970]; hemolysis in another organism [GO:0044179]; lipid catabolic process [GO:0016042]	PATHWAY: Phospholipid metabolism. {ECO:0000305|PubMed:10484737}.	FUNCTION: Catalyzes the hydrolysis of glycerophospholipids such as phosphatidylcholine (1,2-diacyl-sn-glycero-3-phosphocholine) and has a moderate activity to hydrolyze lysoglycerophospholipids such as lysophosphatidylcholine (1-acyl-sn-glycero-3-phosphocholine), but is unable to hydrolyze sphingomyelin. In addition to acting as an allergen, it possesses a potent hemolytic activity on red blood c…	hemolysis in another organism [GO:0044179]; lipid catabolic process [GO:0016042]	extracellular region [GO:0005576]	1-acyl-2-lysophosphatidylserine acylhydrolase activity [GO:0052740]; lysophospholipase activity [GO:0004622]; phosphatidylserine 1-acylhydrolase activity [GO:0052739]; phospholipase A1 activity [GO:0008970]	AB hydrolase superfamily, Lipase family
A0A833VWW5	Catalase (EC 1.11.1.6)	Frieseomelitta varia		catalase activity [GO:0004096]; heme binding [GO:0020037]; metal ion binding [GO:0046872]; hydrogen peroxide catabolic process [GO:0042744]; response to oxidative stress [GO:0006979]		FUNCTION: Occurs in almost all aerobically respiring organisms and serves to protect cells from the toxic effects of hydrogen peroxide. {ECO:0000256|RuleBase:RU004142}.	hydrogen peroxide catabolic process [GO:0042744]; response to oxidative stress [GO:0006979]		catalase activity [GO:0004096]; heme binding [GO:0020037]; metal ion binding [GO:0046872]	Catalase family
A0A154PS68	Dystonin	Dufourea novaeangliae (Sweat bee)		cytoplasm [GO:0005737]; cytoskeleton [GO:0005856]; calcium ion binding [GO:0005509]; microtubule binding [GO:0008017]; intermediate filament cytoskeleton organization [GO:0045104]			intermediate filament cytoskeleton organization [GO:0045104]	cytoplasm [GO:0005737]; cytoskeleton [GO:0005856]	calcium ion binding [GO:0005509]; microtubule binding [GO:0008017]
A0A2A3EAL0	Zinc finger protein-like 1 homolog	Apis cerana cerana (Oriental honeybee)		membrane [GO:0016020]; metal ion binding [GO:0046872]; oxidoreductase activity [GO:0016491]; intracellular cholesterol transport [GO:0032367]			intracellular cholesterol transport [GO:0032367]	membrane [GO:0016020]	metal ion binding [GO:0046872]; oxidoreductase activity [GO:0016491]	ZFPL1 family
A0A833RU32	guanylate cyclase (EC 4.6.1.2)	Frieseomelitta varia		guanylate cyclase activity [GO:0004383]; serine-type endopeptidase activity [GO:0004252]; intracellular signal transduction [GO:0035556]; proteolysis [GO:0006508]			intracellular signal transduction [GO:0035556]; proteolysis [GO:0006508]		guanylate cyclase activity [GO:0004383]; serine-type endopeptidase activity [GO:0004252]
A0A2V1YN43	Outer membrane protein A (Outer membrane porin A)	Enterobacter agglomerans (Erwinia herbicola) (Pantoea agglomerans)	32966572	cell outer membrane [GO:0009279]; pore complex [GO:0046930]; porin activity [GO:0015288]; ion transmembrane transport [GO:0034220]		FUNCTION: With TolR probably plays a role in maintaining the position of the peptidoglycan cell wall in the periplasm. Acts as a porin with low permeability that allows slow penetration of small solutes; an internal gate slows down solute passage. {ECO:0000256|HAMAP-Rule:MF_00842}.	ion transmembrane transport [GO:0034220]	cell outer membrane [GO:0009279]; pore complex [GO:0046930]	porin activity [GO:0015288]	Outer membrane OOP (TC 1.B.6) superfamily, OmpA family
A0A0L0AMD2	Porin	Klebsiella sp. RIT-PI-d		cell outer membrane [GO:0009279]; pore complex [GO:0046930]; porin activity [GO:0015288]; ion transmembrane transport [GO:0034220]			ion transmembrane transport [GO:0034220]	cell outer membrane [GO:0009279]; pore complex [GO:0046930]	porin activity [GO:0015288]	Gram-negative porin family
Q86PH6	Transferrin	Apis mellifera (Honeybee)	11864369; 15841243; 15110862; 17073008; 19096928	extracellular space [GO:0005615]; membrane [GO:0016020]; metal ion binding [GO:0046872]; ion transport [GO:0006811]; iron ion homeostasis [GO:0055072]		FUNCTION: Transferrins are iron binding transport proteins which bind Fe(3+) ion in association with the binding of an anion, usually bicarbonate. {ECO:0000256|PIRNR:PIRNR002549}.	ion transport [GO:0006811]; iron ion homeostasis [GO:0055072]	extracellular space [GO:0005615]; membrane [GO:0016020]	metal ion binding [GO:0046872]	Transferrin family
C0HLL3	Phospholipase A1 (PLA1) (EC 3.1.1.32) (Vesp v 1)	Vespa velutina (Asian yellow-legged hornet)	25896434; 31923175	extracellular region [GO:0005576]; 1-acyl-2-lysophosphatidylserine acylhydrolase activity [GO:0052740]; phosphatidylserine 1-acylhydrolase activity [GO:0052739]; phospholipase A1 activity [GO:0008970]; lipid metabolic process [GO:0006629]		FUNCTION: Catalyzes the hydrolysis of phosphatidylcholine with phospholipase A1 activity (By similarity). May act as an allergen and induce hemolytic activity (By similarity). {ECO:0000250|UniProtKB:P0DMB4, ECO:0000250|UniProtKB:P0DMB7}.	lipid metabolic process [GO:0006629]	extracellular region [GO:0005576]	1-acyl-2-lysophosphatidylserine acylhydrolase activity [GO:0052740]; phosphatidylserine 1-acylhydrolase activity [GO:0052739]; phospholipase A1 activity [GO:0008970]	AB hydrolase superfamily, Lipase family
A0A0L0AQN9	Major outer membrane lipoprotein Lpp	Klebsiella sp. RIT-PI-d		cell outer membrane [GO:0009279]; extracellular region [GO:0005576]; lipid binding [GO:0008289]; peptidoglycan binding [GO:0042834]; lipid modification [GO:0030258]; periplasmic space organization [GO:0043580]		FUNCTION: A highly abundant outer membrane lipoprotein that controls the distance between the inner and outer membranes. The only protein known to be covalently linked to the peptidoglycan network (PGN). Also non-covalently binds the PGN. The link between the cell outer membrane and PGN contributes to maintenance of the structural and functional integrity of the cell envelope, and maintains the c…	lipid modification [GO:0030258]; periplasmic space organization [GO:0043580]	cell outer membrane [GO:0009279]; extracellular region [GO:0005576]	lipid binding [GO:0008289]; peptidoglycan binding [GO:0042834]	Lpp family
A0A833RL01	Dihydrolipoyllysine-residue succinyltransferase component of 2-oxoglutarate dehydrogenase complex, mitochondrial (EC 2.3.1.61) (E2K)	Frieseomelitta varia		oxoglutarate dehydrogenase complex [GO:0045252]; dihydrolipoyllysine-residue succinyltransferase activity [GO:0004149]; L-lysine catabolic process to acetyl-CoA via saccharopine [GO:0033512]; tricarboxylic acid cycle [GO:0006099]	PATHWAY: Amino-acid degradation; L-lysine degradation via saccharopine pathway; glutaryl-CoA from L-lysine: step 6/6. {ECO:0000256|ARBA:ARBA00005145}.		L-lysine catabolic process to acetyl-CoA via saccharopine [GO:0033512]; tricarboxylic acid cycle [GO:0006099]	oxoglutarate dehydrogenase complex [GO:0045252]	dihydrolipoyllysine-residue succinyltransferase activity [GO:0004149]	2-oxoacid dehydrogenase family
A0A154PFC9	Ornithine aminotransferase (EC 2.6.1.13)	Dufourea novaeangliae (Sweat bee)		ornithine(lysine) transaminase activity [GO:0050155]; ornithine-oxo-acid transaminase activity [GO:0004587]; pyridoxal phosphate binding [GO:0030170]; L-proline biosynthetic process [GO:0055129]	PATHWAY: Amino-acid biosynthesis; L-proline biosynthesis; L-glutamate 5-semialdehyde from L-ornithine: step 1/1. {ECO:0000256|ARBA:ARBA00004998, ECO:0000256|RuleBase:RU365036}.		L-proline biosynthetic process [GO:0055129]		ornithine(lysine) transaminase activity [GO:0050155]; ornithine-oxo-acid transaminase activity [GO:0004587]; pyridoxal phosphate binding [GO:0030170]	Class-III pyridoxal-phosphate-dependent aminotransferase family
A0A833VPP9	ornithine aminotransferase (EC 2.6.1.13) (Ornithine--oxo-acid aminotransferase)	Frieseomelitta varia		ornithine-oxo-acid transaminase activity [GO:0004587]; pyridoxal phosphate binding [GO:0030170]; L-proline biosynthetic process [GO:0055129]	PATHWAY: Amino-acid biosynthesis; L-proline biosynthesis; L-glutamate 5-semialdehyde from L-ornithine: step 1/1. {ECO:0000256|ARBA:ARBA00004998}.		L-proline biosynthetic process [GO:0055129]		ornithine-oxo-acid transaminase activity [GO:0004587]; pyridoxal phosphate binding [GO:0030170]	Class-III pyridoxal-phosphate-dependent aminotransferase family
A0A154PN63	Malate dehydrogenase (EC 1.1.1.37)	Dufourea novaeangliae (Sweat bee)		L-malate dehydrogenase activity [GO:0030060]; malate metabolic process [GO:0006108]; tricarboxylic acid cycle [GO:0006099]			malate metabolic process [GO:0006108]; tricarboxylic acid cycle [GO:0006099]		L-malate dehydrogenase activity [GO:0030060]	LDH/MDH superfamily, MDH type 1 family
A0A154PAT6	Malate dehydrogenase (EC 1.1.1.37)	Dufourea novaeangliae (Sweat bee)		L-malate dehydrogenase activity [GO:0030060]; malate metabolic process [GO:0006108]; tricarboxylic acid cycle [GO:0006099]			malate metabolic process [GO:0006108]; tricarboxylic acid cycle [GO:0006099]		L-malate dehydrogenase activity [GO:0030060]	LDH/MDH superfamily, MDH type 2 family
A0A2A3ERL8	Ubiquitin	Apis cerana cerana (Oriental honeybee)		metabolic process [GO:0008152]			metabolic process [GO:0008152]
A0A833SMW3	Tubulin alpha chain	Frieseomelitta varia		microtubule [GO:0005874]; GTP binding [GO:0005525]; structural constituent of cytoskeleton [GO:0005200]; microtubule-based process [GO:0007017]		FUNCTION: Tubulin is the major constituent of microtubules, a cylinder consisting of laterally associated linear protofilaments composed of alpha- and beta-tubulin heterodimers. Microtubules grow by the addition of GTP-tubulin dimers to the microtubule end, where a stabilizing cap forms. Below the cap, tubulin dimers are in GDP-bound state, owing to GTPase activity of alpha-tubulin. {ECO:0000256|…	microtubule-based process [GO:0007017]	microtubule [GO:0005874]	GTP binding [GO:0005525]; structural constituent of cytoskeleton [GO:0005200]	Tubulin family
A0A2A3EPL5	Tubulin beta-4 chain	Apis cerana cerana (Oriental honeybee)		microtubule [GO:0005874]; GTP binding [GO:0005525]; GTPase activity [GO:0003924]; serine-type endopeptidase activity [GO:0004252]; structural constituent of cytoskeleton [GO:0005200]; microtubule-based process [GO:0007017]; proteolysis [GO:0006508]			microtubule-based process [GO:0007017]; proteolysis [GO:0006508]	microtubule [GO:0005874]	GTP binding [GO:0005525]; GTPase activity [GO:0003924]; serine-type endopeptidase activity [GO:0004252]; structural constituent of cytoskeleton [GO:0005200]	Tubulin family
A0A833RSJ3	ADP/ATP translocase (ADP,ATP carrier protein)	Frieseomelitta varia		mitochondrial inner membrane [GO:0005743]; ATP:ADP antiporter activity [GO:0005471]; mitochondrial ADP transmembrane transport [GO:0140021]; mitochondrial ATP transmembrane transport [GO:1990544]		FUNCTION: Catalyzes the exchange of ADP and ATP across the membrane. {ECO:0000256|RuleBase:RU368008}.	mitochondrial ADP transmembrane transport [GO:0140021]; mitochondrial ATP transmembrane transport [GO:1990544]	mitochondrial inner membrane [GO:0005743]	ATP:ADP antiporter activity [GO:0005471]	Mitochondrial carrier (TC 2.A.29) family
A0A833W6L4	Small nuclear ribonucleoprotein-associated protein	Frieseomelitta varia		spliceosomal complex [GO:0005681]; RNA binding [GO:0003723]; mRNA processing [GO:0006397]			mRNA processing [GO:0006397]	spliceosomal complex [GO:0005681]	RNA binding [GO:0003723]	SnRNP SmB/SmN family
A0A821APD0	(mimic poison frog) hypothetical protein	Ranitomeya imitator (mimic poison frog)		extracellular space [GO:0005615]; serine-type endopeptidase inhibitor activity [GO:0004867]; negative regulation of complement activation [GO:0045916]; regulation of blood coagulation [GO:0030193]			negative regulation of complement activation [GO:0045916]; regulation of blood coagulation [GO:0030193]	extracellular space [GO:0005615]	serine-type endopeptidase inhibitor activity [GO:0004867]	Serpin family
A0A822B4D0	(mimic poison frog) hypothetical protein	Ranitomeya imitator (mimic poison frog)		metalloendopeptidase inhibitor activity [GO:0008191]; negative regulation of metalloendopeptidase activity [GO:1904684]			negative regulation of metalloendopeptidase activity [GO:1904684]		metalloendopeptidase inhibitor activity [GO:0008191]
A0A833S8J0	NTF2 domain-containing protein	Frieseomelitta varia		nucleocytoplasmic transport [GO:0006913]			nucleocytoplasmic transport [GO:0006913]
A0A833RKL8	GTP-binding nuclear protein	Frieseomelitta varia		nucleus [GO:0005634]; GTP binding [GO:0005525]; GTPase activity [GO:0003924]; nucleocytoplasmic transport [GO:0006913]; protein transport [GO:0015031]		FUNCTION: GTP-binding protein involved in nucleocytoplasmic transport. Required for the import of protein into the nucleus and also for RNA export. Involved in chromatin condensation and control of cell cycle. {ECO:0000256|RuleBase:RU363057}.	nucleocytoplasmic transport [GO:0006913]; protein transport [GO:0015031]	nucleus [GO:0005634]	GTP binding [GO:0005525]; GTPase activity [GO:0003924]	Small GTPase superfamily, Ran family
A0A833SGG6	Adenosylhomocysteinase (EC 3.3.1.1)	Frieseomelitta varia		hydrolase activity [GO:0016787]; one-carbon metabolic process [GO:0006730]	PATHWAY: Amino-acid biosynthesis; L-homocysteine biosynthesis; L-homocysteine from S-adenosyl-L-homocysteine: step 1/1. {ECO:0000256|RuleBase:RU000548}.		one-carbon metabolic process [GO:0006730]		hydrolase activity [GO:0016787]	Adenosylhomocysteinase family
A0A2A3EGD2	arginine kinase (EC 2.7.3.3)	Apis cerana cerana (Oriental honeybee)		arginine kinase activity [GO:0004054]; ATP binding [GO:0005524]; creatine kinase activity [GO:0004111]; phosphocreatine biosynthetic process [GO:0046314]; phosphorylation [GO:0016310]			phosphocreatine biosynthetic process [GO:0046314]; phosphorylation [GO:0016310]		arginine kinase activity [GO:0004054]; ATP binding [GO:0005524]; creatine kinase activity [GO:0004111]	ATP:guanido phosphotransferase family
Q17TA6	arginine kinase (EC 2.7.3.3)	Bombus festivus		arginine kinase activity [GO:0004054]; ATP binding [GO:0005524]; creatine kinase activity [GO:0004111]; phosphocreatine biosynthetic process [GO:0046314]; phosphorylation [GO:0016310]			phosphocreatine biosynthetic process [GO:0046314]; phosphorylation [GO:0016310]		arginine kinase activity [GO:0004054]; ATP binding [GO:0005524]; creatine kinase activity [GO:0004111]	ATP:guanido phosphotransferase family
A0A833VMV6	Eukaryotic translation initiation factor 5A (eIF-5A)	Frieseomelitta varia		ribosome binding [GO:0043022]; RNA binding [GO:0003723]; translation elongation factor activity [GO:0003746]; positive regulation of translational elongation [GO:0045901]; positive regulation of translational termination [GO:0045905]		FUNCTION: mRNA-binding protein involved in translation elongation. Has an important function at the level of mRNA turnover, probably acting downstream of decapping. Critical for the efficient synthesis of peptide bonds between consecutive proline residues. Can resolve ribosomal stalling caused by consecutive prolines during translation. Involved in actin dynamics and cell cycle progression, mRNA …	positive regulation of translational elongation [GO:0045901]; positive regulation of translational termination [GO:0045905]		ribosome binding [GO:0043022]; RNA binding [GO:0003723]; translation elongation factor activity [GO:0003746]	EIF-5A family
A0A154PQ65	Multifunctional fusion protein [Includes: L-glutamate gamma-semialdehyde dehydrogenase (EC 1.2.1.88) (L-glutamate gamma-semialdehyde dehydrogenase); Delta-1-pyrroline-5-carboxylate dehydrogenase (P5C dehydrogenase)]	Dufourea novaeangliae (Sweat bee)		1-pyrroline-5-carboxylate dehydrogenase activity [GO:0003842]; proline catabolic process to glutamate [GO:0010133]	PATHWAY: Amino-acid degradation; L-proline degradation into L-glutamate; L-glutamate from L-proline: step 2/2. {ECO:0000256|ARBA:ARBA00004786, ECO:0000256|RuleBase:RU366016}.		proline catabolic process to glutamate [GO:0010133]		1-pyrroline-5-carboxylate dehydrogenase activity [GO:0003842]	Aldehyde dehydrogenase family
A0A821WRE0	Proteasome subunit beta	Ranitomeya imitator (mimic poison frog)		cytoplasm [GO:0005737]; nucleus [GO:0005634]; proteasome core complex [GO:0005839]; proteasomal protein catabolic process [GO:0010498]		FUNCTION: Component of the proteasome, a multicatalytic proteinase complex which is characterized by its ability to cleave peptides with Arg, Phe, Tyr, Leu, and Glu adjacent to the leaving group at neutral or slightly basic pH. The proteasome has an ATP-dependent proteolytic activity. {ECO:0000256|RuleBase:RU004203}.	proteasomal protein catabolic process [GO:0010498]	cytoplasm [GO:0005737]; nucleus [GO:0005634]; proteasome core complex [GO:0005839]		Peptidase T1B family
A0A833W9A3	Proteasome subunit alpha type	Frieseomelitta varia		cytoplasm [GO:0005737]; nucleus [GO:0005634]; proteasome core complex, alpha-subunit complex [GO:0019773]; proteasome-mediated ubiquitin-dependent protein catabolic process [GO:0043161]		FUNCTION: The proteasome is a multicatalytic proteinase complex which is characterized by its ability to cleave peptides with Arg, Phe, Tyr, Leu, and Glu adjacent to the leaving group at neutral or slightly basic pH. The proteasome has an ATP-dependent proteolytic activity. {ECO:0000256|ARBA:ARBA00002000}.	proteasome-mediated ubiquitin-dependent protein catabolic process [GO:0043161]	cytoplasm [GO:0005737]; nucleus [GO:0005634]; proteasome core complex, alpha-subunit complex [GO:0019773]		Peptidase T1A family
A0A833WDK7	Calreticulin	Frieseomelitta varia		endoplasmic reticulum lumen [GO:0005788]; calcium ion binding [GO:0005509]; unfolded protein binding [GO:0051082]; protein folding [GO:0006457]			protein folding [GO:0006457]	endoplasmic reticulum lumen [GO:0005788]	calcium ion binding [GO:0005509]; unfolded protein binding [GO:0051082]	Calreticulin family
A0A833RN15	Stress-induced-phosphoprotein 1	Frieseomelitta varia		cytoplasm [GO:0005737]; Hsp70 protein binding [GO:0030544]; Hsp90 protein binding [GO:0051879]; protein folding [GO:0006457]			protein folding [GO:0006457]	cytoplasm [GO:0005737]	Hsp70 protein binding [GO:0030544]; Hsp90 protein binding [GO:0051879]
A0A833WDX6	Heat shock protein 60	Frieseomelitta varia		ATP binding [GO:0005524]; ATP-dependent protein folding chaperone [GO:0140662]; protein refolding [GO:0042026]			protein refolding [GO:0042026]		ATP binding [GO:0005524]; ATP-dependent protein folding chaperone [GO:0140662]	Chaperonin (HSP60) family
A0A833SC55	Rab GDP dissociation inhibitor	Frieseomelitta varia		cytoplasm [GO:0005737]; GTPase activator activity [GO:0005096]; Rab GDP-dissociation inhibitor activity [GO:0005093]; protein transport [GO:0015031]; small GTPase mediated signal transduction [GO:0007264]		FUNCTION: Regulates the GDP/GTP exchange reaction of most RAB proteins by inhibiting the dissociation of GDP from them, and the subsequent binding of GTP. {ECO:0000256|RuleBase:RU363124}.	protein transport [GO:0015031]; small GTPase mediated signal transduction [GO:0007264]	cytoplasm [GO:0005737]	GTPase activator activity [GO:0005096]; Rab GDP-dissociation inhibitor activity [GO:0005093]	Rab GDI family
A0A2A3EC59	Calpain-A	Apis cerana cerana (Oriental honeybee)		calcium ion binding [GO:0005509]; calcium-dependent cysteine-type endopeptidase activity [GO:0004198]; proteolysis [GO:0006508]			proteolysis [GO:0006508]		calcium ion binding [GO:0005509]; calcium-dependent cysteine-type endopeptidase activity [GO:0004198]	Peptidase C2 family
A0A2A3EBK6	LIM domain-binding protein	Apis cerana cerana (Oriental honeybee)		metal ion binding [GO:0046872]; metalloendopeptidase activity [GO:0004222]; proteolysis [GO:0006508]			proteolysis [GO:0006508]		metal ion binding [GO:0046872]; metalloendopeptidase activity [GO:0004222]
A0A2A3E2U1	Zinc carboxypeptidase A	Apis cerana cerana (Oriental honeybee)		metallocarboxypeptidase activity [GO:0004181]; zinc ion binding [GO:0008270]; proteolysis [GO:0006508]			proteolysis [GO:0006508]		metallocarboxypeptidase activity [GO:0004181]; zinc ion binding [GO:0008270]	Peptidase M14 family
A0A154PS34	PDZ and LIM domain protein Zasp	Dufourea novaeangliae (Sweat bee)		metal ion binding [GO:0046872]; metalloendopeptidase activity [GO:0004222]; proteolysis [GO:0006508]			proteolysis [GO:0006508]		metal ion binding [GO:0046872]; metalloendopeptidase activity [GO:0004222]
A0A154PMQ1	Aminopeptidase (EC 3.4.11.-)	Dufourea novaeangliae (Sweat bee)		membrane [GO:0016020]; aminopeptidase activity [GO:0004177]; metallopeptidase activity [GO:0008237]; zinc ion binding [GO:0008270]; proteolysis [GO:0006508]			proteolysis [GO:0006508]	membrane [GO:0016020]	aminopeptidase activity [GO:0004177]; metallopeptidase activity [GO:0008237]; zinc ion binding [GO:0008270]	Peptidase M1 family
A0A833RCD6	Aminopeptidase (EC 3.4.11.-)	Frieseomelitta varia		membrane [GO:0016020]; aminopeptidase activity [GO:0004177]; metallopeptidase activity [GO:0008237]; zinc ion binding [GO:0008270]; proteolysis [GO:0006508]			proteolysis [GO:0006508]	membrane [GO:0016020]	aminopeptidase activity [GO:0004177]; metallopeptidase activity [GO:0008237]; zinc ion binding [GO:0008270]	Peptidase M1 family
A0A833S8G1	Aminopeptidase (EC 3.4.11.-)	Frieseomelitta varia		aminopeptidase activity [GO:0004177]; metallopeptidase activity [GO:0008237]; zinc ion binding [GO:0008270]; proteolysis [GO:0006508]			proteolysis [GO:0006508]		aminopeptidase activity [GO:0004177]; metallopeptidase activity [GO:0008237]; zinc ion binding [GO:0008270]	Peptidase M1 family
A0A833R7S6	Peptidase S1 domain-containing protein	Frieseomelitta varia		serine-type endopeptidase activity [GO:0004252]; proteolysis [GO:0006508]			proteolysis [GO:0006508]		serine-type endopeptidase activity [GO:0004252]
A0A833S6T1	Carboxypeptidase B	Frieseomelitta varia		metallocarboxypeptidase activity [GO:0004181]; zinc ion binding [GO:0008270]; proteolysis [GO:0006508]			proteolysis [GO:0006508]		metallocarboxypeptidase activity [GO:0004181]; zinc ion binding [GO:0008270]	Peptidase M14 family
A0A833RB33	Transmembrane protease serine 9	Frieseomelitta varia		serine-type endopeptidase activity [GO:0004252]; proteolysis [GO:0006508]			proteolysis [GO:0006508]		serine-type endopeptidase activity [GO:0004252]
A0A822I9V0	(mimic poison frog) hypothetical protein	Ranitomeya imitator (mimic poison frog)		serine-type endopeptidase activity [GO:0004252]; proteolysis [GO:0006508]			proteolysis [GO:0006508]		serine-type endopeptidase activity [GO:0004252]
A0A154PS72	Profilin	Dufourea novaeangliae (Sweat bee)		cytoskeleton [GO:0005856]; actin binding [GO:0003779]; regulation of cellular component biogenesis [GO:0044087]		FUNCTION: Binds to actin and affects the structure of the cytoskeleton. At high concentrations, profilin prevents the polymerization of actin, whereas it enhances it at low concentrations. {ECO:0000256|RuleBase:RU003908}.	regulation of cellular component biogenesis [GO:0044087]	cytoskeleton [GO:0005856]	actin binding [GO:0003779]	Profilin family
A0A2A3ECU3	Troponin T	Apis cerana cerana (Oriental honeybee)		troponin complex [GO:0005861]; regulation of muscle contraction [GO:0006937]		FUNCTION: Troponin T is the tropomyosin-binding subunit of troponin, the thin filament regulatory complex which confers calcium-sensitivity to striated muscle actomyosin ATPase activity. {ECO:0000256|ARBA:ARBA00003363}.	regulation of muscle contraction [GO:0006937]	troponin complex [GO:0005861]		Troponin T family
A0A833RNG0	Staphylococcal nuclease domain-containing protein (EC 3.1.31.1)	Frieseomelitta varia		cytoplasm [GO:0005737]; RISC complex [GO:0016442]; endoribonuclease activity [GO:0004521]; RNA-mediated gene silencing [GO:0031047]		FUNCTION: Endonuclease that mediates miRNA decay of both protein-free and AGO2-loaded miRNAs. {ECO:0000256|PIRNR:PIRNR017179}.	RNA-mediated gene silencing [GO:0031047]	cytoplasm [GO:0005737]; RISC complex [GO:0016442]	endoribonuclease activity [GO:0004521]
A0A833SE01	Translocon-associated protein subunit gamma (Signal sequence receptor subunit gamma)	Frieseomelitta varia		endoplasmic reticulum membrane [GO:0005789]; calcium ion binding [GO:0005509]; SRP-dependent cotranslational protein targeting to membrane [GO:0006614]		FUNCTION: TRAP proteins are part of a complex whose function is to bind calcium to the ER membrane and thereby regulate the retention of ER resident proteins. {ECO:0000256|ARBA:ARBA00002838}.	SRP-dependent cotranslational protein targeting to membrane [GO:0006614]	endoplasmic reticulum membrane [GO:0005789]	calcium ion binding [GO:0005509]	TRAP-gamma family
A0A2A3EDV5	Ribosomal protein L15	Apis cerana cerana (Oriental honeybee)		ribonucleoprotein complex [GO:1990904]; ribosome [GO:0005840]; structural constituent of ribosome [GO:0003735]; translation [GO:0006412]			translation [GO:0006412]	ribonucleoprotein complex [GO:1990904]; ribosome [GO:0005840]	structural constituent of ribosome [GO:0003735]	Eukaryotic ribosomal protein eL15 family
A0A833VQ28	40S ribosomal protein S4	Frieseomelitta varia		ribonucleoprotein complex [GO:1990904]; ribosome [GO:0005840]; rRNA binding [GO:0019843]; structural constituent of ribosome [GO:0003735]; translation [GO:0006412]			translation [GO:0006412]	ribonucleoprotein complex [GO:1990904]; ribosome [GO:0005840]	rRNA binding [GO:0019843]; structural constituent of ribosome [GO:0003735]	Eukaryotic ribosomal protein eS4 family
A0A833VPL6	EF-hand domain-containing protein	Frieseomelitta varia		membrane [GO:0016020]; ribonucleoprotein complex [GO:1990904]; ribosome [GO:0005840]; extracellular ligand-gated ion channel activity [GO:0005230]; structural constituent of ribosome [GO:0003735]; translation [GO:0006412]			translation [GO:0006412]	membrane [GO:0016020]; ribonucleoprotein complex [GO:1990904]; ribosome [GO:0005840]	extracellular ligand-gated ion channel activity [GO:0005230]; structural constituent of ribosome [GO:0003735]	Universal ribosomal protein uL4 family
A0A822HAN2	(mimic poison frog) hypothetical protein	Ranitomeya imitator (mimic poison frog)		ribonucleoprotein complex [GO:1990904]; ribosome [GO:0005840]; structural constituent of ribosome [GO:0003735]; translation [GO:0006412]			translation [GO:0006412]	ribonucleoprotein complex [GO:1990904]; ribosome [GO:0005840]	structural constituent of ribosome [GO:0003735]	Universal ribosomal protein uL11 family
A0A2A3E7C0	Trehalase (EC 3.2.1.28) (Alpha-trehalose glucohydrolase)	Apis cerana cerana (Oriental honeybee)		alpha,alpha-trehalase activity [GO:0004555]; trehalose metabolic process [GO:0005991]			trehalose metabolic process [GO:0005991]		alpha,alpha-trehalase activity [GO:0004555]	Glycosyl hydrolase 37 family
A0A833VVD0	Isocitrate dehydrogenase [NAD] subunit, mitochondrial	Frieseomelitta varia		mitochondrion [GO:0005739]; magnesium ion binding [GO:0000287]; NAD binding [GO:0051287]; oxidoreductase activity, acting on the CH-OH group of donors, NAD or NADP as acceptor [GO:0016616]; tricarboxylic acid cycle [GO:0006099]			tricarboxylic acid cycle [GO:0006099]	mitochondrion [GO:0005739]	magnesium ion binding [GO:0000287]; NAD binding [GO:0051287]; oxidoreductase activity, acting on the CH-OH group of donors, NAD or NADP as acceptor [GO:0016616]	Isocitrate and isopropylmalate dehydrogenases family
A0A2A3EDI2	Aconitate hydratase, mitochondrial (Aconitase) (EC 4.2.1.3)	Apis cerana cerana (Oriental honeybee)		mitochondrion [GO:0005739]; 4 iron, 4 sulfur cluster binding [GO:0051539]; aconitate hydratase activity [GO:0003994]; citrate dehydratase activity [GO:0047780]; metal ion binding [GO:0046872]; tricarboxylic acid cycle [GO:0006099]	PATHWAY: Carbohydrate metabolism; tricarboxylic acid cycle; isocitrate from oxaloacetate: step 2/2. {ECO:0000256|ARBA:ARBA00004717}.	FUNCTION: Catalyzes the isomerization of citrate to isocitrate via cis-aconitate. {ECO:0000256|ARBA:ARBA00003113}.	tricarboxylic acid cycle [GO:0006099]	mitochondrion [GO:0005739]	4 iron, 4 sulfur cluster binding [GO:0051539]; aconitate hydratase activity [GO:0003994]; citrate dehydratase activity [GO:0047780]; metal ion binding [GO:0046872]	Aconitase/IPM isomerase family
A0A833SBT7	Succinate--CoA ligase [ADP-forming] subunit beta, mitochondrial (EC 6.2.1.5) (Succinyl-CoA synthetase beta chain) (SCS-beta)	Frieseomelitta varia		mitochondrion [GO:0005739]; ATP binding [GO:0005524]; magnesium ion binding [GO:0000287]; succinate-CoA ligase (ADP-forming) activity [GO:0004775]; tricarboxylic acid cycle [GO:0006099]	PATHWAY: Carbohydrate metabolism; tricarboxylic acid cycle; succinate from succinyl-CoA (ligase route): step 1/1. {ECO:0000256|ARBA:ARBA00005064, ECO:0000256|HAMAP-Rule:MF_03219}.	FUNCTION: Succinyl-CoA synthetase functions in the citric acid cycle (TCA), coupling the hydrolysis of succinyl-CoA to the synthesis of ATP and thus represents the only step of substrate-level phosphorylation in the TCA. The beta subunit provides nucleotide specificity of the enzyme and binds the substrate succinate, while the binding sites for coenzyme A and phosphate are found in the alpha subu…	tricarboxylic acid cycle [GO:0006099]	mitochondrion [GO:0005739]	ATP binding [GO:0005524]; magnesium ion binding [GO:0000287]; succinate-CoA ligase (ADP-forming) activity [GO:0004775]	Succinate/malate CoA ligase beta subunit family
A0A154P3I0	Proteasome subunit alpha type	Dufourea novaeangliae (Sweat bee)		cytoplasm [GO:0005737]; nucleus [GO:0005634]; proteasome core complex, alpha-subunit complex [GO:0019773]; ubiquitin-dependent protein catabolic process [GO:0006511]		FUNCTION: The proteasome is a multicatalytic proteinase complex which is characterized by its ability to cleave peptides with Arg, Phe, Tyr, Leu, and Glu adjacent to the leaving group at neutral or slightly basic pH. The proteasome has an ATP-dependent proteolytic activity. {ECO:0000256|ARBA:ARBA00002000}.	ubiquitin-dependent protein catabolic process [GO:0006511]	cytoplasm [GO:0005737]; nucleus [GO:0005634]; proteasome core complex, alpha-subunit complex [GO:0019773]		Peptidase T1A family
A0A833S2V2	Proteasome subunit alpha type	Frieseomelitta varia		cytoplasm [GO:0005737]; nucleus [GO:0005634]; proteasome core complex, alpha-subunit complex [GO:0019773]; ubiquitin-dependent protein catabolic process [GO:0006511]		FUNCTION: The proteasome is a multicatalytic proteinase complex which is characterized by its ability to cleave peptides with Arg, Phe, Tyr, Leu, and Glu adjacent to the leaving group at neutral or slightly basic pH. The proteasome has an ATP-dependent proteolytic activity. {ECO:0000256|ARBA:ARBA00002000}.	ubiquitin-dependent protein catabolic process [GO:0006511]	cytoplasm [GO:0005737]; nucleus [GO:0005634]; proteasome core complex, alpha-subunit complex [GO:0019773]		Peptidase T1A family
